# Supplementary material for: Integrated mRNA and miRNA Transcriptomic Analyses Reveals Divergent Mechanisms of Sunitinib Resistance in Clear Cell Renal Cell Carcinoma (ccRCC)
Source: MDPI journal article supplement (doi:10.3390/cancers13174401), 2021-08-31
Supplement: s1 [file s1]

# Supplementary Materials: Integrated mRNA and miRNA Transcriptomic Analyses Reveals Divergent Mechanisms of Sunitinib Resistance in Clear cell Renal Cell Carcinoma (ccRCC)

María Armesto, Maitane Marquez, María Arestin, Peio Errarte, Ane Rubio, Lorea Manterola, Jose I. López and Charles H. Lawrie

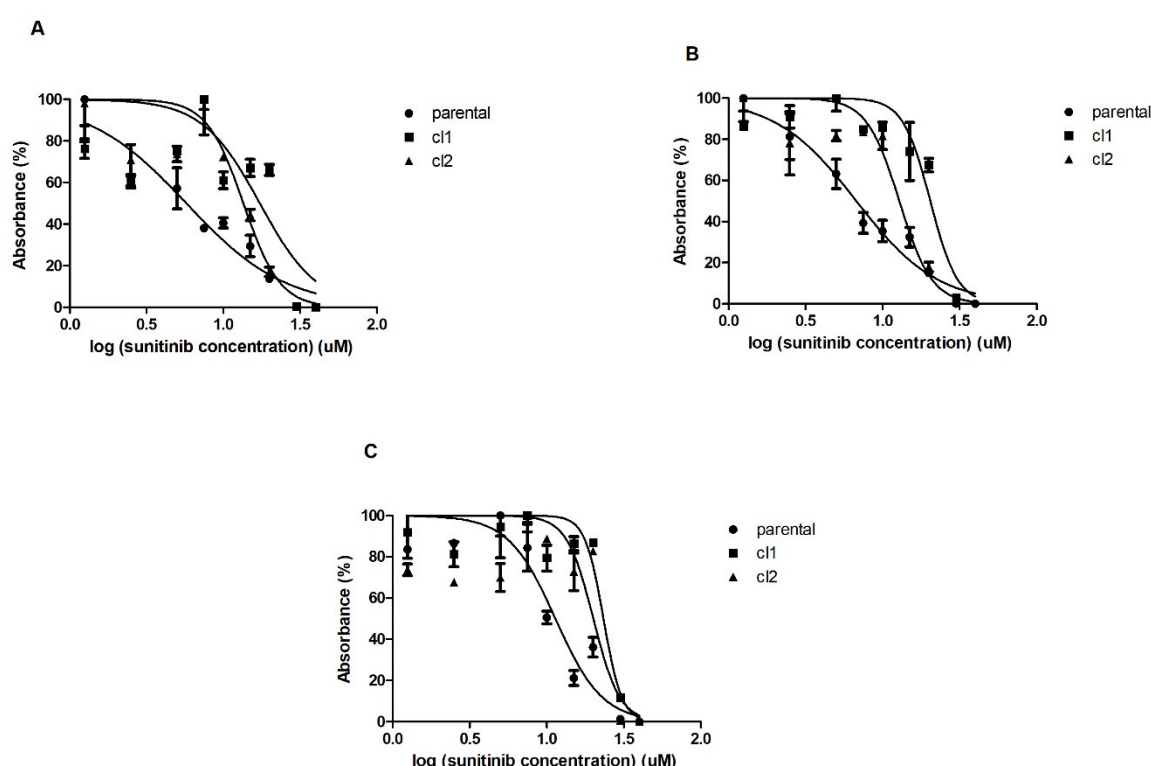

**Figure S1.** Cell proliferation MTT assays of 786-O resistant clones (c1 and c2) and the parental cell line used to calculate the IC<sub>50</sub> value in Table 1. Biological replicate studies were carried out and are depicted in the respective graphs (A–C). Error bars were calculated from the readings obtained in technical triplicates.

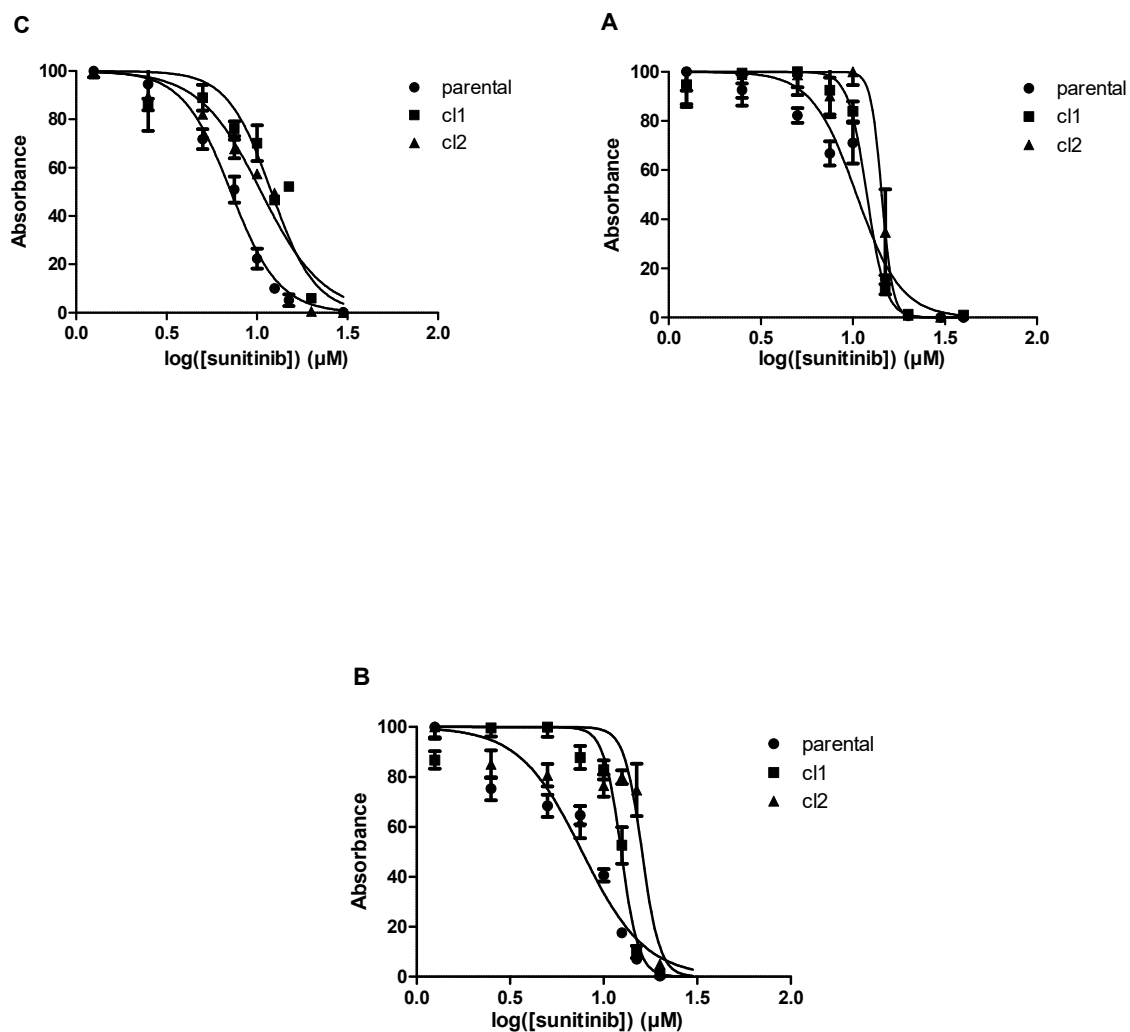

**Figure S2.** Cell proliferation MTT assays of A498 resistant clones (c1 and c2) and the parental cell line used to calculate the IC<sub>50</sub> value in Table 1. Biological replicate studies were carried out and are depicted in the respective graphs (A–C). Error bars were calculated from the readings obtained in technical triplicates.

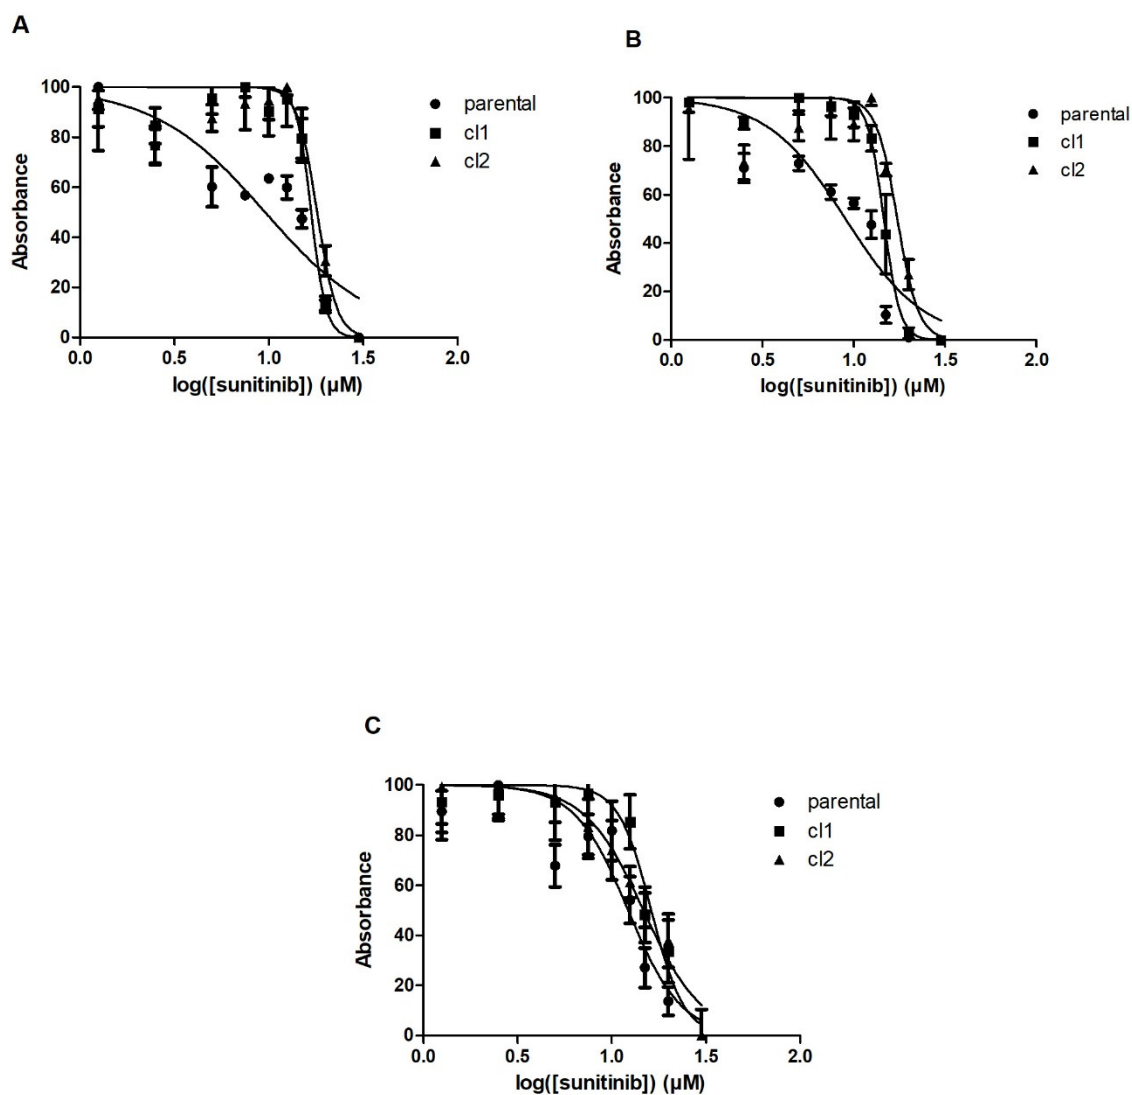

**Figure S3.** Cell proliferation MTT assays of Caki-1 resistant clones (c1 and c2) and the parental cell line used to calculate the  $IC_{50}$  value in Table 1. Biological replicate studies were carried out and are depicted in the respective graphs (A–C). Error bars were calculated from the readings obtained in technical triplicates.

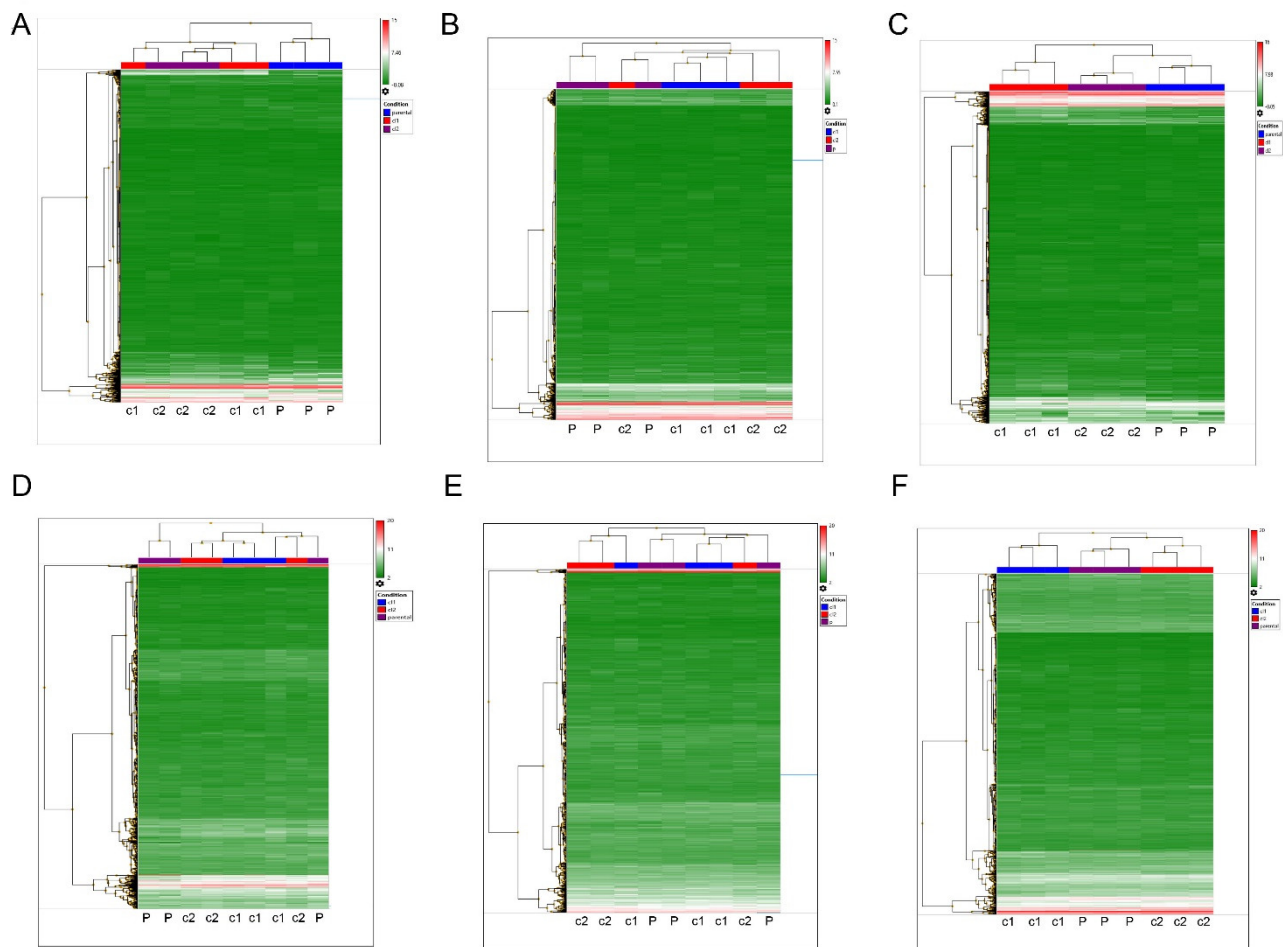

**Figure S4.** Unsupervised cluster analysis heatmaps of miRNA expression (A–C) in 786–O (A), A498 (B) and Caki–1 (C) resistant clones and parental control cell lines. Unsupervised cluster analysis heatmaps of gene expression (D–F) in 786–O (D), A498 (E) and Caki–1 (F) resistant clones and parental control cell lines.

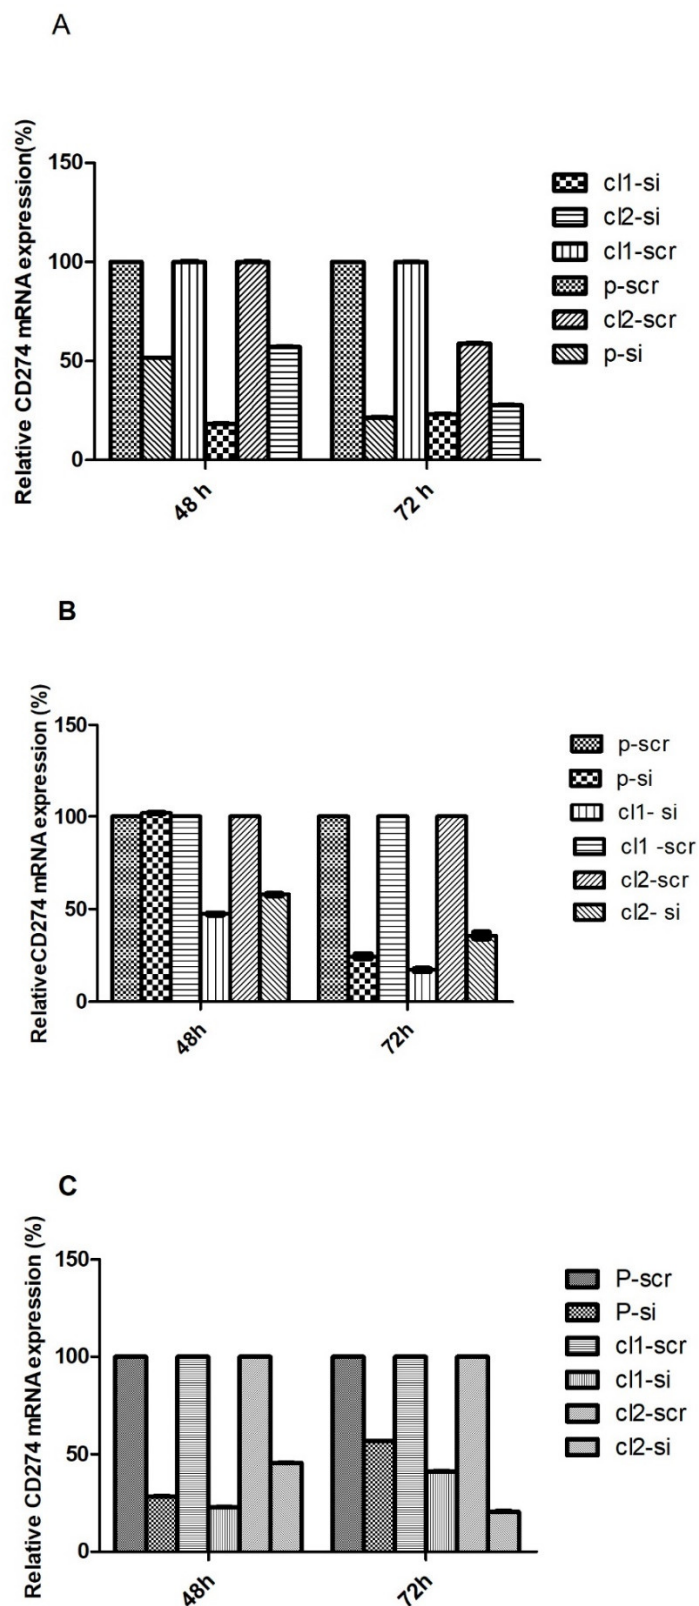

**Figure S5.** Relative *CD274* mRNA expression measured by qRT-PCR in sunitinib resistant clones, cl1 and cl2, and parental cells in 786 -O (A), A498 (B) and Caki-1 (C) cell lines at 48 and 72 h post-transfection with either siRNA or a scramble control.

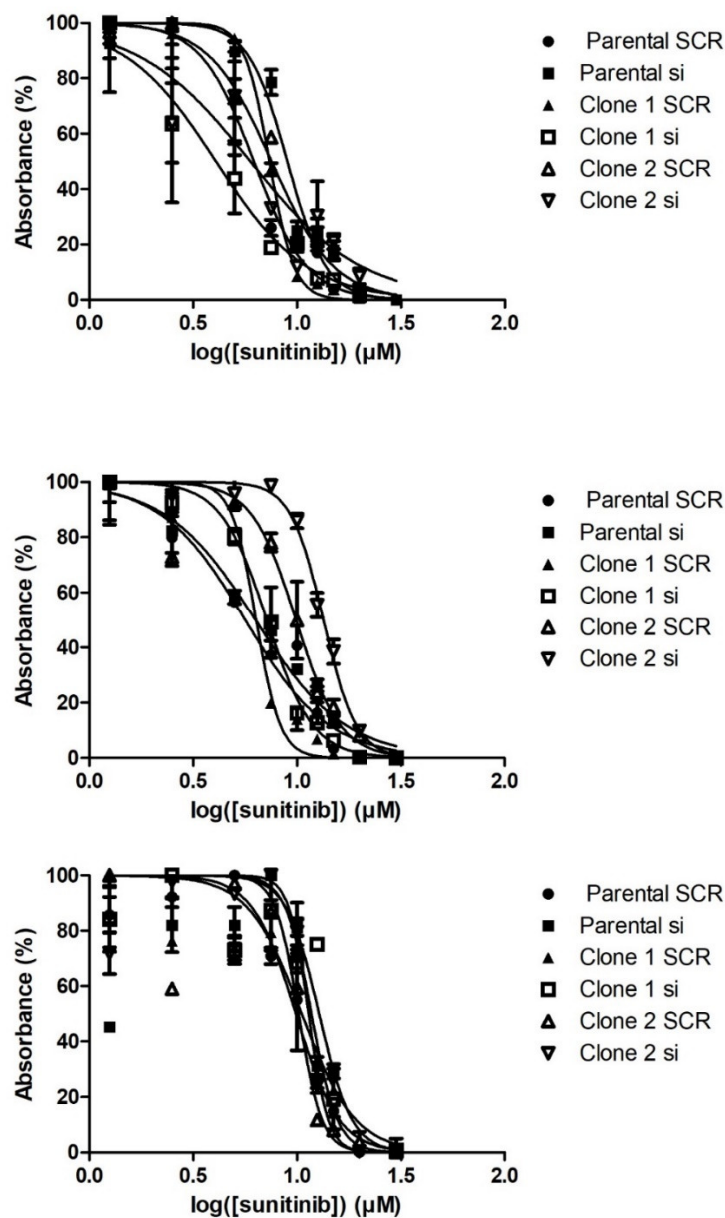

**Figure S6.** Cell proliferation MTT assays of 786-O resistant clones (c1 and c2) and the parental cell line transfected with CD274-siRNA or scramble control siRNA. These data were used to calculate the  $IC_{50}$  value in Table 3. Biological replicate studies were carried out and are depicted in the respective graphs (A–C). Error bars were calculated from the readings obtained in technical triplicates.

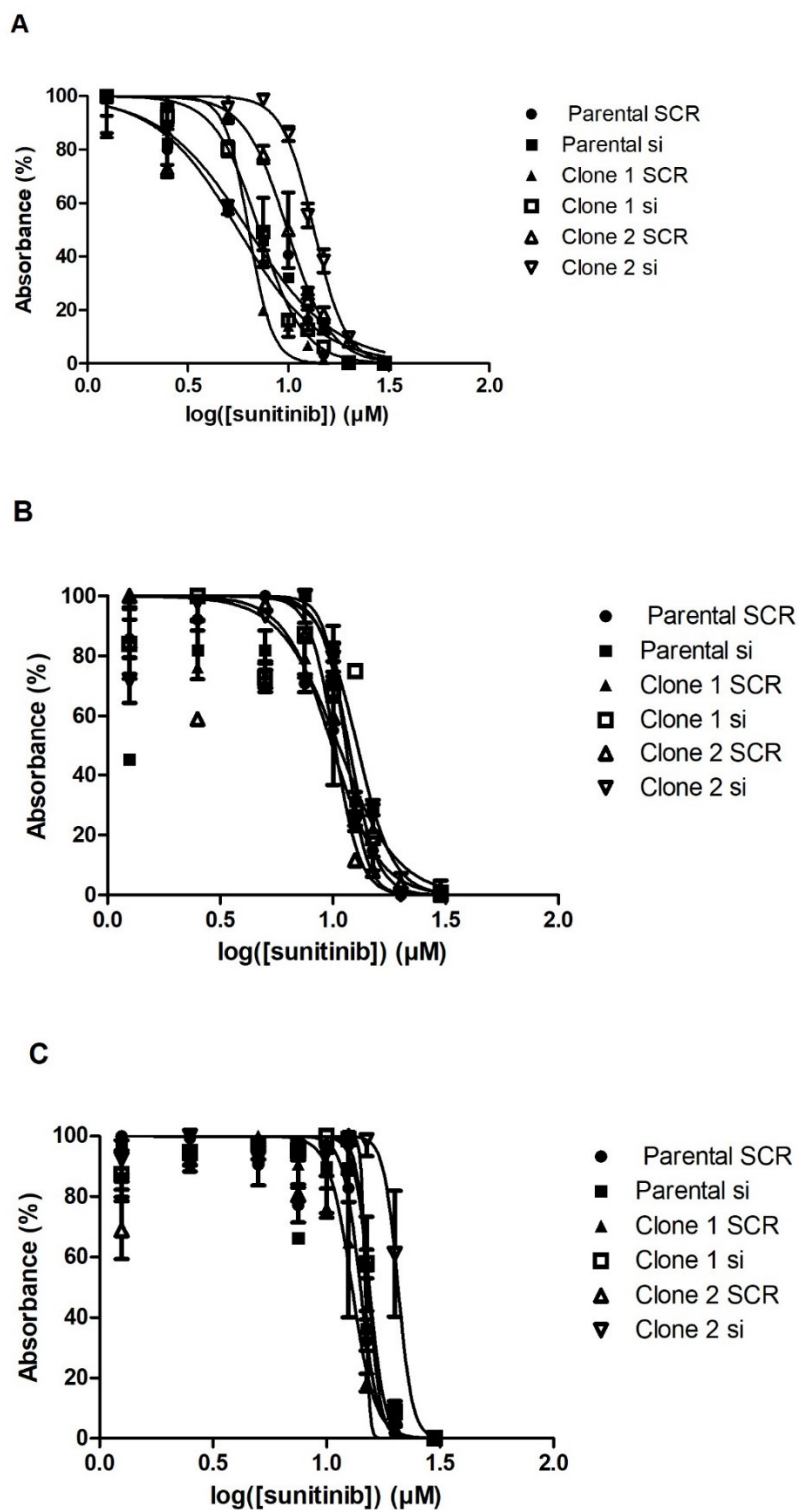

**Figure S7.** Cell proliferation MTT assays of A498 resistant clones (c1 and c2) and the parental cell line transfected with CD274-siRNA or scramble control siRNA. These data were used to calculate the IC<sub>50</sub> value in Table 3. Biological replicate studies were carried out and are depicted in the respective graphs (A–C). Error bars were calculated from the readings obtained in technical triplicates.

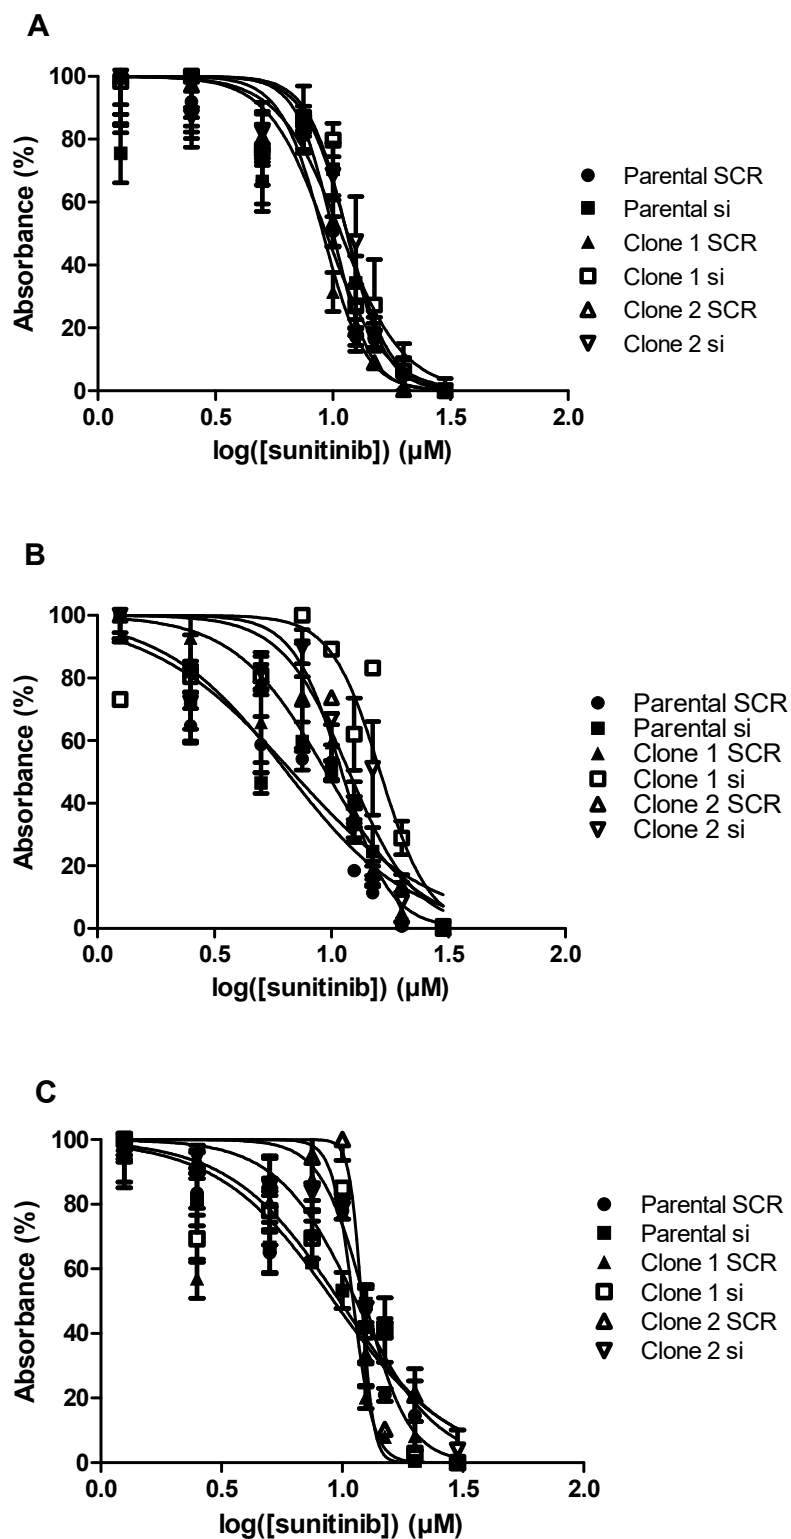

**Figure S8.** Cell proliferation MTT assays of Caki-1 resistant clones (c1 and c2) and the parental cell line transfected with CD274-siRNA or scramble control siRNA. These data were used to calculate the IC<sub>50</sub> value in Table 3. Biological replicate studies were carried out and are depicted in the respective graphs (A–C). Error bars were calculated from the readings obtained in technical triplicates.



**Table S1.** List of miRNAs commonly differentially expressed between 786-O parental (P) and resistant clones c1 and c2.

| <i>miRNA</i>              | Clone1(c1)     | Clone2(c2)     | Parental (P)  | c1/P (Fold) | c2/P(Fold)  |
|---------------------------|----------------|----------------|---------------|-------------|-------------|
| <i>hsa-miR-6068</i>       | 181.02         | 222.86         | 1.62          | 111.14      | 137.01      |
| <i>hsa-miR-4467</i>       | 1200.98        | 1217.75        | 18.77         | 64.25       | 65.22       |
| <i>hsa-miR-5001-5p</i>    | 643.59         | 680.29         | 13.64         | 47.27       | 50.12       |
| <i>hsa-miR-642a-3p</i>    | 118.60         | 105.42         | 2.93          | 40.48       | 36.01       |
| <i>hsa-miR-6825-5p</i>    | 51.27          | 49.18          | 1.75          | 29.18       | 28.00       |
| <i>hsa-miR-1271-5p</i>    | 43.71          | 10.85          | 2.03          | 21.63       | 5.36        |
| <i>hsa-miR-572</i>        | 33.82          | 57.28          | 1.64          | 20.57       | 35.00       |
| <i>hsa-miR-7108-5p</i>    | 1795.29        | 1722.16        | 89.88         | 19.90       | 19.15       |
| <i>hsa-miR-3937</i>       | 38.59          | 42.22          | 2.20          | 17.48       | 19.10       |
| <i>hsa-miR-3621</i>       | 61.39          | 66.26          | 4.50          | 13.61       | 14.67       |
| <i>hsa-miR-6754-5p</i>    | 28.64          | 13.27          | 2.10          | 13.58       | 6.29        |
| <i>hsa-miR-6075</i>       | 33.59          | 55.72          | 2.53          | 13.29       | 22.05       |
| <i>hsa-miR-4721</i>       | 39.12          | 26.35          | 2.97          | 13.19       | 8.85        |
| <i>hsa-miR-642b-3p</i>    | 58.08          | 72.50          | 4.76          | 12.15       | 15.25       |
| <i>hsa-miR-4651</i>       | 232.32         | 184.82         | 20.11         | 11.55       | 9.22        |
| <i>hsa-miR-2861</i>       | 2401.97        | 2336.28        | 222.86        | 10.80       | 10.53       |
| <i>hsa-miR-3154</i>       | 21.86          | 23.59          | 2.03          | 10.75       | 11.65       |
| <i>hsa-miR-6860</i>       | 20.82          | 8.57           | 2.06          | 10.09       | 4.15        |
| <i>hsa-miR-371b-5p</i>    | 17.27          | 28.25          | 1.72          | 10.05       | 16.48       |
| <i>hsa-mir-6860</i>       | 36.76          | 25.46          | 3.66          | 10.04       | 6.95        |
| <i>hsa-miR-8072</i>       | 2778.33        | 2538.92        | 284.05        | 9.76        | 8.94        |
| <b><i>hsa-miR-638</i></b> | <b>3848.29</b> | <b>3640.70</b> | <b>396.18</b> | <b>9.74</b> | <b>9.16</b> |
| <i>hsa-miR-3911</i>       | 40.50          | 24.59          | 4.20          | 9.69        | 5.87        |
| <i>hsa-miR-4649-5p</i>    | 69.07          | 70.03          | 7.46          | 9.21        | 9.34        |
| <i>hsa-miR-4800-3p</i>    | 16.68          | 22.01          | 1.89          | 8.85        | 11.61       |
| <i>hsa-miR-6126</i>       | 374.81         | 407.31         | 42.52         | 8.82        | 9.58        |
| <i>hsa-miR-4430</i>       | 65.34          | 73.01          | 7.46          | 8.74        | 9.79        |
| <i>hsa-miR-3180</i>       | 23.26          | 18.00          | 2.69          | 8.62        | 6.69        |
| <i>hsa-miR-1915-3p</i>    | 5042.77        | 4672.57        | 592.22        | 8.51        | 7.91        |
| <i>hsa-miR-935</i>        | 17.75          | 12.21          | 2.10          | 8.49        | 5.83        |
| <i>hsa-miR-612</i>        | 17.27          | 8.94           | 2.06          | 8.43        | 4.34        |
| <i>hsa-miR-6870-5p</i>    | 32.22          | 29.86          | 3.84          | 8.40        | 7.82        |
| <i>hsa-miR-6802-5p</i>    | 18.64          | 22.78          | 2.25          | 8.26        | 10.12       |
| <i>hsa-miR-6831-5p</i>    | 62.25          | 41.93          | 8.00          | 7.79        | 5.25        |
| <i>hsa-miR-6088</i>       | 5955.47        | 4544.80        | 770.69        | 7.72        | 5.88        |
| <i>hsa-miR-6132</i>       | 27.67          | 24.76          | 3.61          | 7.68        | 6.91        |
| <i>hsa-mir-5703</i>       | 54.95          | 82.71          | 7.31          | 7.52        | 11.31       |
| <i>hsa-miR-4486</i>       | 12.73          | 7.67           | 1.73          | 7.38        | 4.44        |
| <i>hsa-miR-6125</i>       | 5996.90        | 5914.33        | 843.36        | 7.14        | 7.01        |
| <i>hsa-mir-6090</i>       | 20.39          | 16.34          | 2.87          | 7.13        | 5.68        |
| <i>hsa-miR-4436b-5p</i>   | 15.03          | 11.00          | 2.17          | 6.91        | 5.05        |
| <i>hsa-miR-1908-5p</i>    | 1858.60        | 1640.59        | 276.28        | 6.73        | 5.94        |
| <i>hsa-miR-4532</i>       | 560.28         | 390.72         | 83.87         | 6.66        | 4.66        |
| <i>hsa-miR-4497</i>       | 7082.29        | 5042.77        | 1082.39       | 6.58        | 4.68        |
| <i>hsa-miR-6127</i>       | 61.39          | 50.21          | 9.45          | 6.52        | 5.35        |
| <i>hsa-miR-6727-5p</i>    | 3821.70        | 3420.52        | 608.87        | 6.30        | 5.64        |
| <i>hsa-miR-6848-5p</i>    | 19.43          | 13.00          | 3.18          | 6.09        | 4.09        |
| <i>hsa-miR-1281</i>       | 31.12          | 41.07          | 5.13          | 6.05        | 8.01        |
| <i>hsa-miR-6724-5p</i>    | 1951.00        | 2019.80        | 333.14        | 5.86        | 6.09        |
| <i>hsa-miR-6789-5p</i>    | 192.67         | 167.73         | 33.59         | 5.72        | 4.99        |
| <i>hsa-miR-4665-5p</i>    | 18.77          | 25.11          | 3.32          | 5.66        | 7.58        |
| <i>hsa-miR-4669</i>       | 75.06          | 41.64          | 13.45         | 5.57        | 3.09        |
| <i>hsa-miR-6729-5p</i>    | 5556.65        | 5873.48        | 1002.93       | 5.53        | 5.87        |
| <i>hsa-miR-191-3p</i>     | 9.58           | 4.86           | 1.75          | 5.45        | 2.77        |
| <i>hsa-miR-4488</i>       | 2304.12        | 1964.57        | 430.54        | 5.35        | 4.54        |
| <i>hsa-miR-5189-5p</i>    | 16.22          | 13.18          | 3.03          | 5.35        | 4.33        |
| <i>hsa-miR-4505</i>       | 254.23         | 158.68         | 48.50         | 5.25        | 3.29        |
| <i>hsa-miR-4466</i>       | 3691.52        | 2836.70        | 719.08        | 5.12        | 3.92        |
| <i>hsa-miR-1225-5p</i>    | 64.45          | 70.03          | 12.82         | 5.02        | 5.47        |
| <i>hsa-miR-1343-5p</i>    | 164.28         | 118.60         | 34.30         | 4.79        | 3.44        |
| <i>hsa-miR-6805-5p</i>    | 433.53         | 421.68         | 90.51         | 4.79        | 4.67        |
| <i>hsa-miR-6787-5p</i>    | 46.85          | 46.85          | 9.92          | 4.74        | 4.72        |
| <i>hsa-miR-7704</i>       | 10809.4        | 8599.28        | 2272.40       | 4.74        | 3.77        |
| <i>hsa-miR-6728-5p</i>    | 13.93          | 11.55          | 3.01          | 4.64        | 3.85        |
| <i>hsa-miR-3188</i>       | 18.51          | 10.20          | 4.06          | 4.58        | 2.52        |

|                         |         |         |         |      |      |
|-------------------------|---------|---------|---------|------|------|
| <i>hsa-miR-4750-5p</i>  | 13.18   | 18.13   | 2.87    | 4.58 | 6.31 |
| <i>hsa-mir-3656</i>     | 21.71   | 24.25   | 4.86    | 4.49 | 5.00 |
| <i>hsa-miR-138-1-3p</i> | 49.87   | 73.52   | 11.24   | 4.46 | 6.54 |
| <i>hsa-miR-149-3p</i>   | 1520.15 | 1031.12 | 340.14  | 4.46 | 3.04 |
| <i>hsa-miR-1207-5p</i>  | 407.31  | 263.20  | 91.14   | 4.45 | 2.89 |
| <i>hsa-miR-4787-5p</i>  | 13400.5 | 10660.9 | 3019.30 | 4.45 | 3.54 |
| <i>hsa-miR-4690-5p</i>  | 13.18   | 14.12   | 2.97    | 4.43 | 4.75 |
| <i>hsa-miR-3665</i>     | 11268.4 | 11268.4 | 2556.58 | 4.41 | 4.41 |
| <i>hsa-miR-6820-5p</i>  | 16.22   | 10.27   | 3.71    | 4.38 | 2.78 |
| <i>hsa-miR-3180-3p</i>  | 38.05   | 34.54   | 8.69    | 4.37 | 3.96 |
| <i>hsa-miR-6726-5p</i>  | 7.46    | 5.54    | 1.71    | 4.37 | 3.24 |
| <i>hsa-miR-4463</i>     | 224.41  | 263.20  | 52.35   | 4.29 | 5.01 |
| <i>hsa-miR-6812-5p</i>  | 168.90  | 91.14   | 39.95   | 4.25 | 2.28 |
| <i>hsa-mir-6089-1</i>   | 270.60  | 250.73  | 64.45   | 4.21 | 3.90 |
| <i>hsa-mir-6089-2</i>   | 270.60  | 250.73  | 64.45   | 4.21 | 3.90 |
| <i>hsa-miR-6791-5p</i>  | 382.68  | 433.53  | 90.51   | 4.21 | 4.79 |
| <i>hsa-miR-6780b-5p</i> | 29.24   | 42.81   | 7.06    | 4.15 | 6.08 |
| <i>hsa-miR-4674</i>     | 97.01   | 91.77   | 23.43   | 4.14 | 3.91 |
| <i>hsa-miR-3197</i>     | 19.84   | 32.00   | 4.92    | 4.02 | 6.52 |
| <i>hsa-miR-5010-5p</i>  | 10.34   | 5.74    | 2.60    | 3.97 | 2.21 |
| <i>hsa-miR-1587</i>     | 24.42   | 18.51   | 6.19    | 3.95 | 2.98 |
| <i>hsa-miR-6821-5p</i>  | 218.27  | 198.09  | 55.72   | 3.94 | 3.57 |
| <i>hsa-miR-6765-5p</i>  | 249.00  | 203.66  | 64.00   | 3.89 | 3.18 |
| <i>hsa-miR-6786-5p</i>  | 1200.98 | 1136.20 | 308.69  | 3.88 | 3.67 |
| <i>hsa-miR-6891-5p</i>  | 57.28   | 60.13   | 15.35   | 3.75 | 3.92 |
| <i>hsa-miR-3141</i>     | 265.03  | 168.90  | 72.00   | 3.67 | 2.34 |
| <i>hsa-miR-1910-5p</i>  | 48.17   | 28.64   | 13.27   | 3.64 | 2.16 |
| <i>hsa-miR-3620-5p</i>  | 212.31  | 174.85  | 60.13   | 3.54 | 2.92 |
| <i>hsa-miR-4745-5p</i>  | 256.00  | 317.37  | 74.03   | 3.47 | 4.30 |
| <i>hsa-miR-4507</i>     | 44.63   | 42.22   | 12.91   | 3.45 | 3.28 |
| <i>hsa-miR-8063</i>     | 8.63    | 9.71    | 2.53    | 3.42 | 3.83 |
| <i>hsa-miR-6798-5p</i>  | 64.45   | 76.64   | 19.16   | 3.37 | 4.01 |
| <i>hsa-miR-8069</i>     | 3875.05 | 4039.61 | 1152.06 | 3.36 | 3.49 |
| <i>hsa-mir-4281</i>     | 124.50  | 89.26   | 37.53   | 3.32 | 2.37 |
| <i>hsa-miR-4433b-3p</i> | 113.77  | 112.21  | 34.30   | 3.31 | 3.27 |
| <i>hsa-miR-6089</i>     | 5556.65 | 5077.84 | 1675.06 | 3.31 | 3.03 |
| <i>hsa-miR-1237-5p</i>  | 1323.37 | 1200.98 | 401.71  | 3.29 | 2.98 |
| <i>hsa-miR-6782-5p</i>  | 33.36   | 24.59   | 10.20   | 3.29 | 2.41 |
| <i>hsa-miR-6087</i>     | 10809.4 | 7750.10 | 3304.00 | 3.28 | 2.35 |
| <i>hsa-miR-6763-5p</i>  | 33.13   | 29.04   | 10.20   | 3.25 | 2.86 |
| <i>hsa-miR-135a-3p</i>  | 7.94    | 4.92    | 2.45    | 3.24 | 2.01 |
| <i>hsa-miR-1227-5p</i>  | 97.68   | 124.50  | 30.91   | 3.16 | 4.03 |
| <i>hsa-miR-4707-5p</i>  | 182.28  | 225.97  | 58.08   | 3.12 | 3.87 |
| <i>hsa-miR-3178</i>     | 699.41  | 910.17  | 229.13  | 3.07 | 3.99 |
| <i>hsa-miR-4459</i>     | 274.37  | 196.72  | 89.88   | 3.06 | 2.19 |
| <i>hsa-miR-663a</i>     | 617.37  | 670.92  | 202.25  | 3.04 | 3.31 |
| <i>hsa-miR-937-5p</i>   | 58.89   | 57.68   | 19.29   | 3.03 | 2.98 |
| <i>hsa-miR-1909-5p</i>  | 8.51    | 5.78    | 2.85    | 2.99 | 2.04 |
| <i>hsa-miR-4689</i>     | 64.89   | 65.34   | 22.01   | 2.95 | 2.98 |
| <i>hsa-miR-4734</i>     | 121.94  | 159.79  | 41.64   | 2.93 | 3.84 |
| <i>hsa-miR-6090</i>     | 3541.14 | 4299.64 | 1217.75 | 2.91 | 3.53 |
| <i>hsa-miR-920</i>      | 4.89    | 3.41    | 1.69    | 2.90 | 2.02 |
| <i>hsa-miR-6774-5p</i>  | 8.22    | 6.06    | 2.85    | 2.89 | 2.13 |
| <i>hsa-miR-4741</i>     | 32.90   | 43.41   | 11.47   | 2.87 | 3.79 |
| <i>hsa-miR-6850-5p</i>  | 145.01  | 182.28  | 51.27   | 2.82 | 3.55 |
| <i>hsa-miR-3960</i>     | 14766.9 | 13969.5 | 5256.91 | 2.81 | 2.65 |
| <i>hsa-miR-6749-5p</i>  | 69.07   | 64.45   | 24.76   | 2.78 | 2.61 |
| <i>hsa-miR-6716-5p</i>  | 37.01   | 29.45   | 13.55   | 2.74 | 2.18 |
| <i>hsa-miR-4758-5p</i>  | 43.41   | 64.45   | 16.00   | 2.71 | 4.02 |
| <i>hsa-miR-4433-3p</i>  | 33.59   | 40.79   | 12.47   | 2.69 | 3.27 |
| <i>hsa-miR-675-5p</i>   | 5.74    | 10.34   | 2.16    | 2.67 | 4.81 |
| <i>hsa-miR-212-3p</i>   | 5.24    | 5.28    | 1.97    | 2.65 | 2.67 |
| <i>hsa-miR-5196-5p</i>  | 22.63   | 26.35   | 8.51    | 2.65 | 3.08 |
| <i>hsa-miR-3940-5p</i>  | 340.14  | 421.68  | 130.69  | 2.60 | 3.23 |
| <i>hsa-miR-4695-5p</i>  | 37.27   | 47.84   | 15.24   | 2.46 | 3.16 |
| <i>hsa-miR-3162-5p</i>  | 31.12   | 36.50   | 12.82   | 2.43 | 2.85 |
| <i>hsa-miR-4270</i>     | 153.28  | 183.55  | 63.12   | 2.42 | 2.90 |
| <i>hsa-miR-6816-5p</i>  | 349.71  | 374.81  | 145.01  | 2.42 | 2.60 |
| <i>hsa-miR-6808-5p</i>  | 32.90   | 29.04   | 13.64   | 2.41 | 2.13 |

|                               |                |                |                |               |               |
|-------------------------------|----------------|----------------|----------------|---------------|---------------|
| <i>hsa-mir-4734</i>           | 4.69           | 4.69           | 1.95           | 2.40          | 2.40          |
| <i>hsa-miR-6879-5p</i>        | 58.08          | 63.12          | 24.08          | 2.40          | 2.61          |
| <i>hsa-miR-6752-5p</i>        | 159.79         | 199.47         | 67.18          | 2.38          | 2.97          |
| <i>hsa-miR-6734-5p</i>        | 8.28           | 10.41          | 3.51           | 2.35          | 2.96          |
| <i>hsa-miR-874-3p</i>         | 3.89           | 4.41           | 1.72           | 2.26          | 2.56          |
| <i>hsa-mir-6790</i>           | 10.20          | 9.58           | 4.59           | 2.23          | 2.09          |
| <i>hsa-miR-1229-5p</i>        | 9.45           | 13.64          | 4.32           | 2.19          | 3.17          |
| <i>hsa-miR-6768-5p</i>        | 8.69           | 12.13          | 4.20           | 2.08          | 2.89          |
| <i>hsa-miR-4783-3p</i>        | 3.68           | 6.50           | 1.80           | 2.04          | 3.61          |
| <i>hsa-miR-940</i>            | 9.78           | 10.34          | 4.82           | 2.03          | 2.15          |
| <i>hsa-miR-1469</i>           | 617.37         | 760.08         | 306.55         | 2.02          | 2.49          |
| <b><i>hsa-miR-106a-5p</i></b> | <b>996.00</b>  | <b>792.35</b>  | <b>2352.53</b> | <b>−2.36</b>  | <b>−2.98</b>  |
| <b><i>Has-miR-17-5p</i></b>   | <b>1082.39</b> | <b>1112.82</b> | <b>2896.31</b> | <b>−2.67</b>  | <b>−2.61</b>  |
| <i>hsa-miR-296-3p</i>         | 34.78          | 32.22          | 100.43         | −2.89         | −3.11         |
| <i>hsa-miR-20a-5p</i>         | 498.00         | 526.39         | 1448.15        | −2.90         | −2.75         |
| <i>hsa-miR-18a-3p</i>         | 19.16          | 13.36          | 56.10          | −2.94         | −4.20         |
| <i>hsa-miR-4417</i>           | 7.26           | 6.36           | 22.63          | −3.12         | −3.56         |
| <i>hsa-miR-3607-5p</i>        | 1.67           | 2.04           | 5.82           | −3.48         | −2.85         |
| <i>hsa-miR-30d-5p</i>         | 137.19         | 225.97         | 491.14         | −3.60         | −2.19         |
| <b><i>hsa-miR-18a-5p</i></b>  | <b>137.19</b>  | <b>89.88</b>   | <b>498.00</b>  | <b>−3.64</b>  | <b>−5.53</b>  |
| <i>hsa-miR-99a-5p</i>         | 148.06         | 36.25          | 576.03         | −3.91         | −15.88        |
| <i>hsa-miR-4657</i>           | 1.73           | 2.20           | 6.77           | −3.92         | −3.08         |
| <i>hsa-miR-93-5p</i>          | 1530.73        | 1686.71        | 5996.90        | −3.92         | −3.55         |
| <i>hsa-miR-26b-5p</i>         | 1.79           | 1.84           | 7.62           | −4.25         | −4.13         |
| <i>hsa-miR-140-3p</i>         | 261.38         | 250.73         | 1192.69        | −4.55         | −4.74         |
| <i>hsa-miR-6511a-5p</i>       | 2.95           | 6.50           | 13.74          | −4.67         | −2.13         |
| <i>hsa-miR-664b-5p</i>        | 2.68           | 2.38           | 13.45          | −5.05         | −5.64         |
| <i>hsa-miR-4284</i>           | 51.98          | 68.59          | 274.37         | −5.27         | −3.99         |
| <i>hsa-miR-328-3p</i>         | 20.11          | 35.02          | 107.63         | −5.32         | −3.06         |
| <i>hsa-miR-25-5p</i>          | 28.25          | 37.79          | 158.68         | −5.63         | −4.20         |
| <b><i>hsa-mir-21</i></b>      | <b>7.94</b>    | <b>9.00</b>    | <b>53.82</b>   | <b>−6.77</b>  | <b>−5.99</b>  |
| <i>hsa-miR-181a-3p</i>        | 5.50           | 13.00          | 41.64          | −7.59         | −3.20         |
| <i>hsa-mir-3651</i>           | 5.54           | 4.50           | 43.11          | −7.76         | −9.55         |
| <i>hsa-miR-1254</i>           | 3.36           | 3.25           | 26.17          | −7.80         | −8.05         |
| <i>hsa-miR-4668-5p</i>        | 2.53           | 1.65           | 22.32          | −8.79         | −13.48        |
| <b><i>hsa-miR-21-5p</i></b>   | <b>57.68</b>   | <b>113.77</b>  | <b>548.75</b>  | <b>−9.53</b>  | <b>−4.82</b>  |
| <i>hsa-miR-331-5p</i>         | 2.81           | 3.61           | 27.47          | −9.81         | −7.67         |
| <i>hsa-miR-7641</i>           | 45.25          | 79.34          | 461.44         | −10.24        | −5.84         |
| <i>hsa-miR-3651</i>           | 93.05          | 109.90         | 1120.56        | −12.03        | −10.15        |
| <i>hsa-miR-7975</i>           | 5.82           | 15.56          | 75.58          | −12.99        | −4.84         |
| <i>hsa-miR-17-3p</i>          | 5.10           | 6.59           | 75.06          | −14.73        | −11.45        |
| <i>hsa-miR-21-3p</i>          | 12.73          | 14.72          | 227.54         | −17.86        | −15.43        |
| <b><i>hsa-miR-34a-5p</i></b>  | <b>21.86</b>   | <b>42.52</b>   | <b>694.58</b>  | <b>−31.73</b> | <b>−16.39</b> |
| <i>hsa-miR-196b-3p</i>        | 11.00          | 36.25          | 448.82         | −40.93        | −12.40        |

Values shown are median intensities. Those miRNAs that were validated by qRT-PCR are depicted in bold type.

**Table S2.** List of miRNAs commonly differentially expressed between A498 parental (P) and resistant clones c1 and c2.

| miRNA                         | Clone1(c1)     | Clone2(c2)     | Parental      | c1/P (Fold)  | c2/P (Fold)  |
|-------------------------------|----------------|----------------|---------------|--------------|--------------|
| <i>hsa-miR-6068</i>           | 97.68          | 183.55         | 6.45          | 15.16        | 28.44        |
| <i>hsa-miR-371b-5p</i>        | 18.13          | 14.12          | 2.35          | 7.74         | 6.02         |
| <i>hsa-miR-6126</i>           | 487.75         | 354.59         | 72.00         | 6.78         | 4.91         |
| <i>hsa-miR-4467</i>           | 415.87         | 760.08         | 70.52         | 5.88         | 10.76        |
| <i>hsa-miR-1202</i>           | 19.56          | 10.63          | 3.34          | 5.84         | 3.17         |
| <i>hsa-miR-34c-5p</i>         | 43.11          | 21.11          | 8.69          | 4.95         | 2.43         |
| <i>hsa-miR-4430</i>           | 42.52          | 20.11          | 9.13          | 4.65         | 2.2          |
| <i>hsa-miR-6754-5p</i>        | 12.13          | 9.71           | 2.71          | 4.46         | 3.57         |
| <i>hsa-miR-6075</i>           | 32.67          | 29.65          | 8.34          | 3.9          | 3.56         |
| <i>hsa-miR-150-3p</i>         | 43.71          | 51.98          | 11.16         | 3.9          | 4.64         |
| <i>hsa-miR-7108-5p</i>        | 786.88         | 1144.10        | 206.50        | 3.81         | 5.54         |
| <i>hsa-miR-3162-5p</i>        | 37.01          | 24.76          | 10.85         | 3.41         | 2.29         |
| <i>hsa-miR-5001-5p</i>        | 436.55         | 588.13         | 133.44        | 3.29         | 4.41         |
| <b><i>hsa-miR-15-5p</i></b>   | <b>1152.06</b> | <b>1448.15</b> | <b>354.59</b> | <b>3.24</b>  | <b>4.09</b>  |
| <i>hsa-miR-1915-3p</i>        | 2179.83        | 3191.46        | 704.28        | 3.1          | 4.52         |
| <i>hsa-miR-4505</i>           | 124.50         | 129.79         | 40.79         | 3.06         | 3.18         |
| <i>hsa-miR-6724-5p</i>        | 861.08         | 1234.75        | 284.05        | 3.04         | 4.36         |
| <i>hsa-miR-4787-5p</i>        | 4672.57        | 6038.61        | 1584.71       | 2.96         | 3.82         |
| <i>hsa-miR-4689</i>           | 78.25          | 82.14          | 26.91         | 2.91         | 3.05         |
| <i>hsa-miR-2861</i>           | 968.76         | 1217.75        | 330.84        | 2.91         | 3.68         |
| <i>hsa-miR-6743-5p</i>        | 433.53         | 357.05         | 151.17        | 2.86         | 2.36         |
| <i>hsa-miR-3937</i>           | 30.70          | 29.86          | 10.70         | 2.86         | 2.78         |
| <i>hsa-miR-8072</i>           | 1097.50        | 1746.20        | 388.02        | 2.82         | 4.49         |
| <i>hsa-miR-4741</i>           | 49.18          | 86.22          | 18.00         | 2.74         | 4.79         |
| <i>hsa-miR-6729-5p</i>        | 2336.28        | 3468.27        | 855.13        | 2.73         | 4.06         |
| <i>hsa-miR-34c-3p</i>         | 58.49          | 48.84          | 21.71         | 2.69         | 2.25         |
| <b><i>hsa-miR-638</i></b>     | <b>1509.65</b> | <b>2210.26</b> | <b>564.18</b> | <b>2.66</b>  | <b>3.9</b>   |
| <i>hsa-miR-6132</i>           | 21.41          | 23.10          | 8.11          | 2.64         | 2.86         |
| <i>hsa-miR-1225-5p</i>        | 51.98          | 73.52          | 19.84         | 2.62         | 3.69         |
| <i>hsa-miR-6125</i>           | 2418.67        | 3615.55        | 962.07        | 2.51         | 3.77         |
| <i>hsa-miR-4516</i>           | 1584.71        | 1562.89        | 634.73        | 2.51         | 2.48         |
| <i>hsa-miR-3665</i>           | 5556.65        | 6793.79        | 2336.28       | 2.39         | 2.91         |
| <i>hsa-miR-1908-5p</i>        | 879.17         | 1458.23        | 369.65        | 2.37         | 3.93         |
| <i>hsa-miR-320e</i>           | 168.90         | 141.04         | 344.89        | −2.04        | −2.45        |
| <i>hsa-miR-484</i>            | 119.43         | 122.79         | 252.48        | −2.11        | −2.05        |
| <i>hsa-miR-550a-3p</i>        | 99.73          | 82.71          | 219.79        | −2.22        | −2.65        |
| <i>hsa-miR-671-3p</i>         | 57.28          | 55.33          | 128.00        | −2.23        | −2.32        |
| <i>hsa-miR-99a-5p</i>         | 855.13         | 652.58         | 1910.85       | −2.23        | −2.92        |
| <i>hsa-miR-125b-2-3p</i>      | 76.11          | 65.80          | 184.82        | −2.42        | −2.79        |
| <i>hsa-miR-148b-3p</i>        | 15.14          | 10.06          | 36.76         | −2.43        | −3.65        |
| <i>hsa-miR-363-3p</i>         | 1.68           | 1.47           | 4.14          | −2.45        | −2.81        |
| <i>hsa-miR-92b</i>            | 121.94         | 151.17         | 304.44        | −2.5         | −2.01        |
| <b><i>hsa-miR-34a-3p</i></b>  | <b>77.71</b>   | <b>78.25</b>   | <b>195.36</b> | <b>−2.5</b>  | <b>−2.49</b> |
| <i>hsa-miR-2110</i>           | 26.54          | 13.93          | 67.18         | −2.53        | −4.82        |
| <i>hsa-miR-1296-5p</i>        | 13.18          | 16.68          | 35.75         | −2.72        | −2.14        |
| <i>hsa-miR-1910-3p</i>        | 4.00           | 5.39           | 12.55         | −3.13        | −2.33        |
| <i>hsa-miR-92b-3p</i>         | 809.00         | 1269.46        | 2665.15       | −3.28        | −2.1         |
| <b><i>hsa-miR-146b-5p</i></b> | <b>8.28</b>    | <b>7.11</b>    | <b>33.36</b>  | <b>−4.04</b> | <b>−4.69</b> |
| <i>hsa-miR-328-3p</i>         | 4.56           | 15.03          | 48.17         | −10.52       | −3.19        |
| <i>hsa-miR-145-5p</i>         | 1.83           | 2.19           | 20.53         | −11.23       | −9.42        |

**Table S3.** List of miRNAs commonly differentially expressed between Caki-1 parental (P) and resistant clones c1 and c2.

| miRNA                     | Clone1(c1)    | Clone2(c2)    | Parental    | c1/P (Fold)   | c2/P(Fold)   |
|---------------------------|---------------|---------------|-------------|---------------|--------------|
| <i>miR-92a-1-5p</i>       | 1428.22       | 328.56        | 2.79        | 512           | 118.07       |
| <b><i>miR-200b-5p</i></b> | <b>382.68</b> | <b>118.60</b> | <b>2.95</b> | <b>129.76</b> | <b>40.04</b> |
| <b><i>miR-200a-5p</i></b> | <b>135.30</b> | <b>62.68</b>  | <b>1.75</b> | <b>76.79</b>  | <b>35.74</b> |
| <b><i>miR-210-5p</i></b>  | <b>224.41</b> | <b>76.11</b>  | <b>3.68</b> | <b>61.13</b>  | <b>20.74</b> |
| <i>miR-708-5p</i>         | 156.50        | 19.70         | 2.71        | 57.66         | 7.27         |
| <i>miR-92b-3p</i>         | 138.14        | 29.45         | 3.05        | 45.2          | 9.63         |
| <i>miR-193b-5p</i>        | 256.00        | 33.59         | 6.36        | 40.05         | 5.25         |
| <i>miR-18a-3p</i>         | 290.02        | 41.07         | 7.52        | 38.47         | 5.46         |
| <i>miR-210-3p</i>         | 5914.33       | 1782.89       | 182.28      | 32.31         | 9.78         |
| <i>miR-3613-5p</i>        | 55.33         | 4.99          | 1.87        | 29.72         | 2.68         |

|                           |               |              |              |              |              |
|---------------------------|---------------|--------------|--------------|--------------|--------------|
| <i>miR-138-5p</i>         | 46.85         | 10.13        | 1.93         | 24.32        | 5.26         |
| <i>miR-766-3p</i>         | 53.45         | 18.77        | 2.22         | 24.11        | 8.47         |
| <i>miR-2110</i>           | 64.00         | 19.84        | 2.75         | 23.32        | 7.22         |
| <i>mir-92b</i>            | 74.54         | 97.01        | 3.29         | 22.75        | 29.46        |
| <i>miR-328-3p</i>         | 59.30         | 17.63        | 2.71         | 21.93        | 6.5          |
| <i>miR-138-1-3p</i>       | 54.95         | 16.22        | 2.77         | 19.9         | 5.87         |
| <i>miR-125a-3p</i>        | 1192.69       | 232.32       | 61.82        | 19.34        | 3.75         |
| <i>miR-5189-3p</i>        | 37.53         | 4.23         | 2.01         | 18.66        | 2.1          |
| <i>miR-1307-3p</i>        | 81.57         | 24.25        | 4.38         | 18.63        | 5.52         |
| <i>miR-23a-5p</i>         | 78.79         | 25.28        | 4.26         | 18.55        | 5.96         |
| <i>miR-3184-3p</i>        | 133.44        | 40.50        | 7.21         | 18.51        | 5.61         |
| <b><i>miR-18a-5p</i></b>  | <b>85.63</b>  | <b>27.67</b> | <b>4.66</b>  | <b>18.42</b> | <b>5.93</b>  |
| <i>miR-365a-5p</i>        | 580.04        | 105.42       | 31.78        | 18.35        | 3.33         |
| <i>miR-1180-3p</i>        | 2876.30       | 803.41       | 156.50       | 18.35        | 5.13         |
| <i>miR-18b-5p</i>         | 45.89         | 16.11        | 2.51         | 18.26        | 6.42         |
| <i>miR-365b-5p</i>        | 93.70         | 41.36        | 5.28         | 17.8         | 7.85         |
| <i>miR-8075</i>           | 344.89        | 125.37       | 19.84        | 17.39        | 6.32         |
| <i>miR-197-3p</i>         | 112.99        | 40.50        | 7.26         | 15.52        | 5.58         |
| <i>miR-423-5p</i>         | 31.34         | 8.94         | 2.20         | 14.27        | 4.06         |
| <i>miR-550a-3-5p</i>      | 71.51         | 15.78        | 5.03         | 14.25        | 3.14         |
| <i>miR-1972</i>           | 21.71         | 8.57         | 1.59         | 13.63        | 5.4          |
| <i>miR-193a-5p</i>        | 39.12         | 19.43        | 2.89         | 13.5         | 6.72         |
| <i>miR-345-5p</i>         | 83.87         | 28.25        | 6.19         | 13.49        | 4.54         |
| <i>miR-744-5p</i>         | 34.54         | 10.56        | 2.58         | 13.33        | 4.06         |
| <i>miR-31-5p</i>          | 30.70         | 8.46         | 2.35         | 13.13        | 3.6          |
| <i>miR-101-5p</i>         | 352.14        | 95.01        | 26.91        | 13.03        | 3.51         |
| <i>miR-1301-3p</i>        | 39.12         | 14.03        | 3.03         | 12.88        | 4.62         |
| <i>miR-941</i>            | 63.12         | 18.90        | 4.99         | 12.64        | 3.77         |
| <i>miR-331-5p</i>         | 19.70         | 9.25         | 1.58         | 12.45        | 5.85         |
| <i>miR-615-3p</i>         | 52.35         | 19.97        | 4.35         | 12.06        | 4.58         |
| <i>miR-550a-5p</i>        | 35.75         | 25.99        | 2.99         | 11.98        | 8.71         |
| <i>miR-455-3p</i>         | 86.22         | 36.25        | 7.21         | 11.97        | 5.02         |
| <i>miR-330-3p</i>         | 263.20        | 69.55        | 23.26        | 11.3         | 2.98         |
| <i>miR-877-5p</i>         | 28.05         | 18.38        | 2.53         | 11.09        | 7.27         |
| <i>miR-30b-3p</i>         | 61.39         | 32.45        | 5.58         | 11.04        | 5.83         |
| <b><i>miR-21-5p</i></b>   | <b>219.79</b> | <b>60.97</b> | <b>20.11</b> | <b>10.93</b> | <b>3.03</b>  |
| <i>miR-585-5p</i>         | 49.52         | 22.32        | 4.53         | 10.91        | 4.93         |
| <b><i>miR-106a-5p</i></b> | <b>30.48</b>  | <b>33.36</b> | <b>2.83</b>  | <b>10.8</b>  | <b>11.79</b> |
| <i>miR-1275</i>           | 126.24        | 69.55        | 11.71        | 10.76        | 5.94         |
| <i>miR-4284</i>           | 23.43         | 8.11         | 2.25         | 10.36        | 3.59         |
| <i>miR-4417</i>           | 82.14         | 38.05        | 8.06         | 10.22        | 4.72         |
| <b><i>miR-17-5p</i></b>   | <b>69.55</b>  | <b>27.47</b> | <b>6.92</b>  | <b>10.06</b> | <b>3.95</b>  |
| <i>miR-652-3p</i>         | 31.56         | 7.67         | 3.16         | 9.99         | 2.43         |
| <i>miR-505-5p</i>         | 29.65         | 13.83        | 2.99         | 9.92         | 4.6          |
| <i>miR-125b-1-3p</i>      | 35.75         | 48.50        | 3.68         | 9.69         | 13.17        |
| <i>miR-378a-3p</i>        | 50.56         | 21.56        | 5.31         | 9.52         | 4.04         |
| <i>mir-6776</i>           | 5404.70       | 1710.26      | 572.05       | 9.46         | 2.99         |
| <i>miR-574-3p</i>         | 41.93         | 20.11        | 4.53         | 9.23         | 4.43         |
| <i>miR-4701-3p</i>        | 14.83         | 5.03         | 1.64         | 9.03         | 3.07         |
| <i>miR-423-3p</i>         | 57.28         | 32.22        | 6.45         | 8.88         | 4.98         |
| <i>miR-193b-3p</i>        | 21.71         | 10.13        | 2.45         | 8.87         | 4.12         |
| <i>miR-339-5p</i>         | 15.89         | 7.78         | 1.82         | 8.74         | 4.29         |
| <i>miR-874-3p</i>         | 79.89         | 43.11        | 9.32         | 8.54         | 4.63         |
| <i>miR-130b-3p</i>        | 24.25         | 13.36        | 2.89         | 8.44         | 4.63         |
| <i>miR-320a</i>           | 16.11         | 7.73         | 1.96         | 8.22         | 3.93         |
| <i>miR-320b</i>           | 74.54         | 33.36        | 9.06         | 8.2          | 3.67         |
| <i>miR-502-3p</i>         | 7696.57       | 2256.70      | 942.27       | 8.17         | 2.4          |
| <i>miR-1343-3p</i>        | 192.67        | 54.95        | 23.75        | 8.15         | 2.31         |
| <i>miR-296-3p</i>         | 156.50        | 48.84        | 19.29        | 8.12         | 2.53         |
| <i>miR-106b-3p</i>        | 19.70         | 13.36        | 2.48         | 7.94         | 5.4          |
| <i>miR-23b-5p</i>         | 27.86         | 18.64        | 3.58         | 7.75         | 5.19         |
| <i>miR-2115-5p</i>        | 36.25         | 19.29        | 4.69         | 7.7          | 4.09         |
| <i>miR-1296-5p</i>        | 44.02         | 28.64        | 5.74         | 7.66         | 5.01         |
| <i>miR-31-3p</i>          | 19.03         | 59.71        | 2.48         | 7.66         | 24.06        |
| <i>miR-491-5p</i>         | 42.22         | 27.67        | 5.54         | 7.58         | 4.98         |
| <i>miR-27a-5p</i>         | 26.17         | 71.01        | 3.48         | 7.56         | 20.44        |
| <i>miR-99b-3p</i>         | 18.38         | 28.05        | 2.43         | 7.55         | 11.56        |
| <i>miR-25-5p</i>          | 17.15         | 5.24         | 2.28         | 7.51         | 2.3          |
| <i>miR-339-3p</i>         | 14.32         | 3.94         | 1.92         | 7.49         | 2.05         |

|                       |             |             |             |             |             |
|-----------------------|-------------|-------------|-------------|-------------|-------------|
| <i>miR-769-3p</i>     | 24.25       | 30.48       | 3.25        | 7.46        | 9.42        |
| <i>miR-320c</i>       | 9877.98     | 2977.74     | 1332.57     | 7.45        | 2.24        |
| <i>miR-615-5p</i>     | 26.91       | 10.93       | 3.61        | 7.44        | 3.02        |
| <i>miR-4298</i>       | 306.55      | 135.30      | 42.22       | 7.29        | 3.22        |
| <i>mir-526a-2</i>     | 48.50       | 19.70       | 6.82        | 7.12        | 2.89        |
| <i>miR-7847-3p</i>    | 12.47       | 4.66        | 1.75        | 7.09        | 2.66        |
| <i>miR-93-5p</i>      | 103.97      | 35.51       | 14.83       | 7.03        | 2.4         |
| <i>mir-4449</i>       | 13.09       | 12.73       | 1.85        | 7.02        | 6.84        |
| <i>miR-3663-3p</i>    | 261.38      | 86.22       | 37.79       | 6.89        | 2.28        |
| <i>mir-711</i>        | 16.11       | 8.69        | 2.35        | 6.86        | 3.72        |
| <i>miR-6836-5p</i>    | 102.54      | 35.26       | 15.24       | 6.74        | 2.33        |
| <i>miR-7846-3p</i>    | 14.93       | 9.92        | 2.23        | 6.65        | 4.41        |
| <i>miR-181c-3p</i>    | 11993.79    | 3640.70     | 1807.78     | 6.62        | 2.02        |
| <i>mir-4734</i>       | 48.50       | 40.79       | 7.31        | 6.62        | 5.59        |
| <i>miR-3137</i>       | 24.59       | 15.78       | 3.76        | 6.54        | 4.19        |
| <i>miR-4776-5p</i>    | 17.75       | 9.71        | 2.71        | 6.54        | 3.57        |
| <i>miR-6084</i>       | 25709.25    | 12077.21    | 3983.99     | 6.49        | 3.04        |
| <i>miR-1199-5p</i>    | 28.84       | 21.11       | 4.50        | 6.43        | 4.69        |
| <i>miR-203a</i>       | 21.56       | 9.45        | 3.36        | 6.42        | 2.82        |
| <i>miR-1238-5p</i>    | 48.50       | 45.57       | 7.57        | 6.4         | 6.02        |
| <i>miR-4731-5p</i>    | 14.03       | 5.24        | 2.19        | 6.39        | 2.39        |
| <i>miR-6856-5p</i>    | 21.11       | 8.46        | 3.29        | 6.39        | 2.56        |
| <i>miR-6875-5p</i>    | 121.10      | 38.59       | 18.90       | 6.37        | 2.04        |
| <i>mir-4674</i>       | 16.56       | 7.84        | 2.62        | 6.3         | 2.97        |
| <i>miR-6076</i>       | 38.32       | 122.79      | 6.11        | 6.27        | 20.02       |
| <i>miR-4458</i>       | 13.93       | 25.46       | 2.23        | 6.25        | 11.4        |
| <i>miR-6735-5p</i>    | 14.93       | 5.21        | 2.43        | 6.17        | 2.15        |
| <i>miR-224-5p</i>     | 18.00       | 6.45        | 2.95        | 6.13        | 2.2         |
| <i>miR-4784</i>       | 12.13       | 4.38        | 1.97        | 6.13        | 2.22        |
| <i>miR-192-5p</i>     | 11190.60    | 4640.29     | 1820.35     | 6.12        | 2.55        |
| <i>miR-4253</i>       | 18.51       | 7.16        | 3.05        | 6.07        | 2.35        |
| <i>miR-4725-3p</i>    | 22.16       | 14.52       | 3.66        | 6.05        | 3.98        |
| <i>miR-3714</i>       | 14.62       | 12.04       | 2.45        | 5.98        | 4.94        |
| <i>miR-8060</i>       | 13587.57    | 5914.33     | 2288.20     | 5.93        | 2.59        |
| <i>miR-3194-5p</i>    | 13682.08    | 6888.62     | 2320.15     | 5.88        | 2.96        |
| <b><i>mir-638</i></b> | <b>8.22</b> | <b>3.53</b> | <b>1.39</b> | <b>5.88</b> | <b>2.53</b> |
| <i>miR-4486</i>       | 158.68      | 66.26       | 27.28       | 5.83        | 2.43        |
| <i>miR-4465</i>       | 15.78       | 6.73        | 2.75        | 5.74        | 2.45        |
| <i>miR-183-3p</i>     | 26.91       | 81.57       | 4.69        | 5.72        | 17.29       |
| <i>mir-3150a</i>      | 108.38      | 41.07       | 19.56       | 5.56        | 2.1         |
| <i>miR-301a-3p</i>    | 14.83       | 13.00       | 2.68        | 5.52        | 4.85        |
| <i>mir-3917</i>       | 14.83       | 16.00       | 2.71        | 5.45        | 5.89        |
| <i>mir-8072</i>       | 8.94        | 4.06        | 1.64        | 5.44        | 2.48        |
| <i>miR-8071</i>       | 7.67        | 2.93        | 1.43        | 5.35        | 2.04        |
| <i>miR-6830-5p</i>    | 55.33       | 24.59       | 10.41       | 5.32        | 2.37        |
| <i>miR-363-3p</i>     | 10.06       | 7.94        | 1.91        | 5.29        | 4.17        |
| <i>miR-3622b-5p</i>   | 11.96       | 65.80       | 2.28        | 5.24        | 28.76       |
| <i>miR-3187-3p</i>    | 14.93       | 9.00        | 2.93        | 5.09        | 3.08        |
| <i>miR-6759-5p</i>    | 22.47       | 15.03       | 4.44        | 5.05        | 3.38        |
| <i>miR-7977</i>       | 60.13       | 31.56       | 12.21       | 4.91        | 2.59        |
| <i>miR-6873-5p</i>    | 14.93       | 10.48       | 3.05        | 4.89        | 3.42        |
| <i>miR-1236-5p</i>    | 216.77      | 110.66      | 44.94       | 4.82        | 2.46        |
| <i>miR-4788</i>       | 8.63        | 3.73        | 1.79        | 4.82        | 2.09        |
| <i>miR-6738-5p</i>    | 13.74       | 6.28        | 2.85        | 4.81        | 2.2         |
| <i>miR-126-3p</i>     | 14.32       | 8.06        | 2.97        | 4.81        | 2.71        |
| <i>miR-5088-5p</i>    | 18.51       | 8.00        | 3.86        | 4.78        | 2.07        |
| <i>mir-6790</i>       | 14.22       | 48.50       | 2.99        | 4.77        | 16.25       |
| <i>miR-711</i>        | 29.24       | 22.16       | 6.11        | 4.77        | 3.62        |
| <i>miR-4638-5p</i>    | 21.11       | 11.96       | 4.44        | 4.77        | 2.7         |
| <i>miR-6080</i>       | 498.00      | 337.79      | 104.69      | 4.75        | 3.23        |
| <i>miR-6746-3p</i>    | 11.16       | 5.70        | 2.41        | 4.64        | 2.38        |
| <i>mir-611</i>        | 21.71       | 11.16       | 4.69        | 4.6         | 2.37        |
| <i>miR-3156-5p</i>    | 17.15       | 11.00       | 3.81        | 4.52        | 2.9         |
| <i>miR-1909-3p</i>    | 105.42      | 48.84       | 23.43       | 4.49        | 2.09        |
| <i>miR-5189-5p</i>    | 15.56       | 12.91       | 3.48        | 4.47        | 3.69        |
| <i>miR-4454</i>       | 47.50       | 30.06       | 10.63       | 4.47        | 2.83        |
| <i>miR-4498</i>       | 17.15       | 30.06       | 3.86        | 4.44        | 7.74        |
| <i>mir-4632</i>       | 7.67        | 36.00       | 1.75        | 4.38        | 20.49       |
| <i>miR-6869-5p</i>    | 84.45       | 39.95       | 19.43       | 4.37        | 2.05        |

|                          |              |               |             |             |              |
|--------------------------|--------------|---------------|-------------|-------------|--------------|
| <i>mir-4787</i>          | 15.45        | 16.91         | 3.53        | 4.36        | 4.78         |
| <i>miR-4688</i>          | 70.03        | 40.22         | 16.00       | 4.35        | 2.51         |
| <i>miR-628-3p</i>        | 10.27        | 5.35          | 2.41        | 4.26        | 2.23         |
| <i>miR-6879-5p</i>       | 7.11         | 4.82          | 1.67        | 4.26        | 2.89         |
| <i>miR-7152-3p</i>       | 174.85       | 82.71         | 41.36       | 4.24        | 2            |
| <i>miR-4695-3p</i>       | 23.75        | 48.17         | 5.62        | 4.23        | 8.61         |
| <i>miR-6782-5p</i>       | 59.30        | 51.63         | 14.03       | 4.22        | 3.7          |
| <i>miR-6845-5p</i>       | 15.14        | 10.06         | 3.63        | 4.15        | 2.77         |
| <i>miR-584-5p</i>        | 13969.57     | 7486.11       | 3373.43     | 4.14        | 2.22         |
| <b><i>miR-29b-3p</i></b> | <b>6.41</b>  | <b>4.69</b>   | <b>1.55</b> | <b>4.13</b> | <b>3.04</b>  |
| <i>miR-4667-5p</i>       | 45.57        | 34.30         | 11.08       | 4.11        | 3.1          |
| <i>miR-6777-5p</i>       | 5595.30      | 6608.01       | 1379.57     | 4.05        | 4.8          |
| <i>miR-4655-5p</i>       | 61.39        | 53.82         | 15.24       | 4.04        | 3.52         |
| <i>miR-8089</i>          | 232.32       | 127.12        | 57.68       | 4.03        | 2.2          |
| <i>miR-3622a-5p</i>      | 6.50         | 4.89          | 1.67        | 3.88        | 2.92         |
| <i>miR-6795-5p</i>       | 5.35         | 2.87          | 1.39        | 3.85        | 2.06         |
| <i>miR-4708-5p</i>       | 8.11         | 4.50          | 2.13        | 3.81        | 2.11         |
| <i>miR-3185</i>          | 6.82         | 4.17          | 1.79        | 3.81        | 2.33         |
| <i>miR-22-5p</i>         | 8.69         | 5.10          | 2.30        | 3.79        | 2.22         |
| <i>miR-4743-5p</i>       | 6.77         | 5.82          | 1.79        | 3.78        | 3.24         |
| <i>mir-3960</i>          | 59.30        | 32.90         | 15.89       | 3.75        | 2.07         |
| <i>miR-4539</i>          | 9.58         | 11.00         | 2.57        | 3.74        | 4.28         |
| <i>miR-4665-3p</i>       | 42.52        | 116.16        | 11.47       | 3.7         | 10.08        |
| <i>miR-4481</i>          | 8.17         | 7.21          | 2.23        | 3.65        | 3.23         |
| <i>miR-4741</i>          | 11.24        | 14.83         | 3.14        | 3.58        | 4.72         |
| <i>miR-4479</i>          | 12.55        | 16.80         | 3.61        | 3.49        | 4.68         |
| <i>miR-6784-5p</i>       | 809.00       | 929.30        | 232.32      | 3.47        | 3.98         |
| <i>miR-6510-5p</i>       | 7.78         | 5.03          | 2.25        | 3.47        | 2.23         |
| <i>miR-6877-5p</i>       | 7.78         | 5.50          | 2.36        | 3.29        | 2.33         |
| <i>miR-8085</i>          | 18.51        | 20.25         | 5.66        | 3.25        | 3.57         |
| <i>miR-148a-3p</i>       | 7.11         | 8.00          | 2.19        | 3.25        | 3.63         |
| <i>miR-6829-5p</i>       | 7.94         | 46.53         | 2.48        | 3.22        | 18.85        |
| <i>miR-2392</i>          | 7.62         | 9.25          | 2.38        | 3.21        | 3.89         |
| <i>mir-3123</i>          | 12.21        | 10.78         | 3.86        | 3.17        | 2.78         |
| <i>miR-6772-5p</i>       | 7.84         | 5.66          | 2.48        | 3.15        | 2.28         |
| <i>miR-6887-5p</i>       | 4.03         | 3.32          | 1.29        | 3.1         | 2.56         |
| <i>miR-659-3p</i>        | 5.13         | 11.08         | 1.68        | 3.06        | 6.58         |
| <i>miR-6848-5p</i>       | 13.09        | 9.99          | 4.35        | 3           | 2.3          |
| <i>miR-660-5p</i>        | 10.93        | 24.42         | 3.73        | 2.94        | 6.56         |
| <i>miR-4322</i>          | 5.66         | 7.62          | 2.00        | 2.82        | 3.79         |
| <i>miR-4665-5p</i>       | 79.34        | 73.01         | 28.25       | 2.81        | 2.59         |
| <i>miR-6729-5p</i>       | 18.51        | 16.00         | 6.63        | 2.79        | 2.41         |
| <i>miR-6892-5p</i>       | 4.56         | 5.50          | 1.66        | 2.75        | 3.3          |
| <i>miR-6125</i>          | 12.38        | 12.64         | 4.53        | 2.73        | 2.79         |
| <i>miR-6740-5p</i>       | 5.21         | 7.84          | 1.92        | 2.72        | 4.09         |
| <i>miR-665</i>           | 6.92         | 7.67          | 2.55        | 2.71        | 3.01         |
| <i>miR-4513</i>          | 4.35         | 4.29          | 1.62        | 2.68        | 2.64         |
| <b><i>miR-638</i></b>    | <b>19.70</b> | <b>188.71</b> | <b>7.41</b> | <b>2.66</b> | <b>25.46</b> |
| <i>miR-4722-5p</i>       | 3.58         | 2.97          | 1.37        | 2.61        | 2.17         |
| <i>miR-4257</i>          | 8.46         | 47.50         | 3.25        | 2.61        | 14.7         |
| <i>miR-1304-3p</i>       | 13.64        | 11.79         | 5.24        | 2.59        | 2.25         |
| <i>miR-34a-3p</i>        | 8.17         | 12.73         | 3.18        | 2.56        | 4            |
| <i>miR-452-5p</i>        | 8.22         | 11.88         | 3.34        | 2.47        | 3.56         |
| <i>miR-6737-5p</i>       | 19.56        | 16.56         | 8.06        | 2.43        | 2.06         |
| <i>miR-5196-5p</i>       | 5.98         | 13.00         | 2.51        | 2.39        | 5.19         |
| <i>miR-6800-3p</i>       | 3.97         | 4.00          | 1.66        | 2.38        | 2.4          |
| <i>miR-6796-5p</i>       | 4.35         | 3.86          | 1.85        | 2.34        | 2.1          |
| <i>miR-6086</i>          | 4.35         | 4.69          | 1.87        | 2.34        | 2.51         |
| <i>miR-5572</i>          | 109.90       | 357.05        | 47.84       | 2.3         | 7.46         |
| <i>miR-7106-5p</i>       | 4.11         | 7.36          | 1.84        | 2.23        | 4            |
| <i>miR-4787-5p</i>       | 4.66         | 4.66          | 2.10        | 2.22        | 2.22         |
| <i>miR-4685-5p</i>       | 4.69         | 4.69          | 2.14        | 2.2         | 2.19         |
| <i>miR-4767</i>          | 17.88        | 19.97         | 8.17        | 2.18        | 2.44         |
| <i>miR-3197</i>          | 3.86         | 3.92          | 1.77        | 2.18        | 2.21         |
| <i>miR-1915-3p</i>       | 8.69         | 25.11         | 4.17        | 2.08        | 6.02         |
| <i>miR-3682-3p</i>       | 12.64        | 14.22         | 6.15        | 2.06        | 2.31         |
| <i>miR-4690-5p</i>       | 33.82        | 33.82         | 68.12       | −2.01       | −2.01        |
| <i>miR-3652</i>          | 50.21        | 39.95         | 101.13      | −2.02       | −2.53        |
| <i>miR-7150</i>          | 184.82       | 182.28        | 385.34      | −2.1        | −2.12        |

|                     |         |         |          |       |        |
|---------------------|---------|---------|----------|-------|--------|
| <i>miR-4442</i>     | 166.57  | 141.04  | 357.05   | −2.14 | −2.54  |
| <i>mir-3656</i>     | 2005.85 | 2105.58 | 4299.64  | −2.15 | −2.04  |
| <i>miR-8064</i>     | 556.41  | 596.34  | 1251.98  | −2.24 | −2.1   |
| <i>miR-6861-5p</i>  | 1.34    | 1.49    | 3.01     | −2.25 | −2.02  |
| <i>miR-4695-5p</i>  | 410.15  | 448.82  | 935.76   | −2.29 | −2.09  |
| <i>miR-6833-5p</i>  | 14.32   | 10.34   | 37.27    | −2.61 | −3.6   |
| <i>miR-8072</i>     | 2957.17 | 3691.52 | 7750.10  | −2.63 | −2.1   |
| <i>miR-6721-5p</i>  | 35.02   | 45.25   | 93.05    | −2.66 | −2.06  |
| <i>miR-4708-3p</i>  | 170.07  | 182.28  | 455.09   | −2.68 | −2.5   |
| <i>miR-6760-5p</i>  | 60.97   | 44.02   | 166.57   | −2.73 | −3.79  |
| <i>miR-1244</i>     | 245.57  | 151.17  | 694.58   | −2.84 | −4.59  |
| <i>miR-148b-3p</i>  | 86.82   | 124.50  | 257.78   | −2.97 | −2.06  |
| <i>miR-6781-5p</i>  | 76.64   | 60.97   | 232.32   | −3.03 | −3.8   |
| <i>miR-140-5p</i>   | 4.79    | 37.27   | 14.62    | −3.04 | 2.55   |
| <i>miR-6728-5p</i>  | 61.39   | 29.86   | 192.67   | −3.14 | −6.46  |
| <i>miR-8063</i>     | 247.28  | 242.19  | 786.88   | −3.19 | −3.26  |
| <i>miR-483-5p</i>   | 93.70   | 141.04  | 298.17   | −3.19 | −2.13  |
| <i>miR-3147</i>     | 82.14   | 97.01   | 263.20   | −3.2  | −2.71  |
| <i>miR-3162-5p</i>  | 4.92    | 3.84    | 16.22    | −3.3  | −4.25  |
| <i>miR-4433-3p</i>  | 56.89   | 38.32   | 188.71   | −3.3  | −4.91  |
| <i>miR-2861</i>     | 168.90  | 249.00  | 564.18   | −3.33 | −2.26  |
| <i>mir-5703</i>     | 3902.01 | 4359.66 | 13124.73 | −3.36 | −3.01  |
| <i>mir-4785</i>     | 4011.71 | 4544.80 | 13587.57 | −3.38 | −2.99  |
| <i>miR-6726-5p</i>  | 207.94  | 263.20  | 704.28   | −3.4  | −2.68  |
| <i>miR-5006-5p</i>  | 34.06   | 29.24   | 116.16   | −3.41 | −3.98  |
| <i>miR-211-3p</i>   | 238.86  | 374.81  | 831.75   | −3.48 | −2.21  |
| <i>miR-6754-3p</i>  | 1448.15 | 1287.18 | 5113.16  | −3.54 | −3.97  |
| <i>miR-5739</i>     | 781.44  | 781.44  | 2876.30  | −3.7  | −3.7   |
| <i>mir-6729</i>     | 10.06   | 14.32   | 37.53    | −3.72 | −2.63  |
| <i>mir-6869</i>     | 1606.83 | 1782.89 | 5996.90  | −3.74 | −3.37  |
| <i>miR-7108-5p</i>  | 6.36    | 9.58    | 23.92    | −3.75 | −2.49  |
| <i>miR-6799-5p</i>  | 86.82   | 91.14   | 326.29   | −3.77 | −3.57  |
| <i>miR-6790-5p</i>  | 280.14  | 224.41  | 1060.11  | −3.77 | −4.7   |
| <i>miR-346</i>      | 53.45   | 73.52   | 206.50   | −3.88 | −2.82  |
| <i>miR-6734-5p</i>  | 92.41   | 114.56  | 359.54   | −3.89 | −3.14  |
| <i>miR-6132</i>     | 2538.92 | 3956.48 | 9946.68  | −3.92 | −2.52  |
| <i>miR-933</i>      | 24.59   | 40.79   | 97.01    | −3.94 | −2.38  |
| <i>miR-1909-5p</i>  | 186.11  | 215.27  | 739.29   | −3.96 | −3.43  |
| <i>miR-6075</i>     | 288.01  | 128.89  | 1152.06  | −3.98 | −8.93  |
| <i>miR-885-3p</i>   | 1964.57 | 3492.39 | 8023.41  | −4.07 | −2.29  |
| <i>miR-4640-5p</i>  | 2.08    | 3.07    | 8.57     | −4.13 | −2.79  |
| <i>miR-1225-5p</i>  | 242.19  | 380.04  | 1016.93  | −4.19 | −2.66  |
| <i>miR-6820-5p</i>  | 28.25   | 38.59   | 120.26   | −4.28 | −3.13  |
| <i>miR-1202</i>     | 91.77   | 91.14   | 401.71   | −4.36 | −4.4   |
| <i>miR-6794-5p</i>  | 22.94   | 22.32   | 100.43   | −4.37 | −4.5   |
| <i>miR-6802-5p</i>  | 22.47   | 37.79   | 102.54   | −4.56 | −2.72  |
| <i>miR-6746-5p</i>  | 410.15  | 498.00  | 1871.53  | −4.56 | −3.76  |
| <i>miR-6741-5p</i>  | 109.90  | 154.34  | 504.95   | −4.6  | −3.29  |
| <i>miR-4271</i>     | 30.70   | 61.39   | 142.02   | −4.61 | −2.31  |
| <i>miR-6797-5p</i>  | 36.50   | 34.78   | 168.90   | −4.65 | −4.86  |
| <i>miR-4428</i>     | 57.28   | 46.53   | 268.73   | −4.7  | −5.75  |
| <i>miR-937-5p</i>   | 14.52   | 13.83   | 68.12    | −4.71 | −4.94  |
| <i>miR-135a-3p</i>  | 2592.27 | 4096.00 | 12330.98 | −4.75 | −3     |
| <i>miR-6894-5p</i>  | 284.05  | 167.73  | 1360.57  | −4.78 | −8.14  |
| <i>miR-1587</i>     | 128.00  | 171.25  | 625.99   | −4.89 | −3.67  |
| <i>miR-6774-5p</i>  | 765.36  | 1112.82 | 3821.70  | −4.98 | −3.43  |
| <i>miR-943</i>      | 14.03   | 26.91   | 71.01    | −5.05 | −2.63  |
| <i>miR-3188</i>     | 12.30   | 30.27   | 62.68    | −5.07 | −2.06  |
| <i>miR-1238-3p</i>  | 625.99  | 430.54  | 3236.01  | −5.15 | −7.53  |
| <i>miR-4800-3p</i>  | 143.01  | 272.48  | 744.43   | −5.21 | −2.74  |
| <i>miR-1281</i>     | 41.93   | 105.42  | 219.79   | −5.25 | −2.09  |
| <i>miR-6780b-5p</i> | 29.45   | 28.84   | 155.42   | −5.26 | −5.38  |
| <i>miR-6069</i>     | 10.48   | 24.25   | 56.10    | −5.36 | −2.31  |
| <i>miR-5001-5p</i>  | 65.80   | 69.07   | 380.04   | −5.77 | −5.47  |
| <i>miR-6798-5p</i>  | 17.75   | 7.26    | 103.25   | −5.82 | −14.15 |
| <i>miR-4706</i>     | 209.38  | 219.79  | 1305.15  | −6.26 | −5.94  |
| <i>miR-6716-5p</i>  | 6.32    | 5.21    | 39.95    | −6.35 | −7.68  |
| <i>miR-191-3p</i>   | 105.42  | 97.01   | 670.92   | −6.38 | −6.92  |
| <i>miR-6893-5p</i>  | 186.11  | 190.02  | 1200.98  | −6.45 | −6.32  |



|                    |        |        |         |        |        |
|--------------------|--------|--------|---------|--------|--------|
| <i>miR-920</i>     | 50.21  | 107.63 | 324.03  | −6.45  | −3     |
| <i>miR-4651</i>    | 111.43 | 191.34 | 754.83  | −6.74  | −3.94  |
| <i>miR-1224-5p</i> | 46.53  | 51.63  | 321.80  | −6.94  | −6.25  |
| <i>miR-3154</i>    | 31.78  | 103.97 | 230.72  | −7.24  | −2.22  |
| <i>miR-1231</i>    | 16.91  | 47.84  | 131.60  | −7.82  | −2.77  |
| <i>miR-6813-5p</i> | 46.21  | 45.57  | 388.02  | −8.42  | −8.54  |
| <i>miR-5571-5p</i> | 10.20  | 19.16  | 86.82   | −8.53  | −4.52  |
| <i>miR-6754-5p</i> | 491.14 | 272.48 | 4211.15 | −8.58  | −15.44 |
| <i>miR-557</i>     | 2.35   | 4.23   | 24.08   | −10.21 | −5.69  |
| <i>miR-4467</i>    | 652.58 | 448.82 | 6936.54 | −10.6  | −15.39 |
| <i>miR-4430</i>    | 11.96  | 29.04  | 144.01  | −12.02 | −4.98  |
| <i>miR-642b-3p</i> | 56.89  | 54.95  | 724.08  | −12.73 | −13.15 |
| <i>miR-6824-5p</i> | 206.50 | 826.00 | 2836.70 | −13.65 | −3.42  |
| <i>miR-6825-5p</i> | 4.79   | 17.88  | 91.77   | −19.12 | −5.13  |
| <i>miR-3937</i>    | 2.95   | 3.78   | 60.97   | −20.71 | −16.19 |
| <i>miR-371b-5p</i> | 3.51   | 6.36   | 73.01   | −20.88 | −11.43 |
| <i>miR-572</i>     | 7.11   | 45.89  | 174.85  | −24.62 | −3.82  |
| <i>miR-6068</i>    | 23.26  | 66.26  | 600.49  | −25.78 | −9.03  |

Values shown are median intensities. Those miRNAs that were validated by qRT-PCR are depicted in bold type.

**Table S4.** List of top 100 differentially expressed genes between 786-O parental (P) and resistant clones c1 and c2. Arranged according to FDR *F-value*.

| Gene           | Clone#1 | Clone#2 | Parental | c1/P (Fold) | c2/P(Fold) | <i>p</i> -val |
|----------------|---------|---------|----------|-------------|------------|---------------|
| <i>WLS</i>     | 2091.03 | 903.89  | 20.97    | 99.73       | 43.11      | 2.47E-09      |
| <i>CTHRC1</i>  | 26801.0 | 79023.8 | 67.65    | 396.18      | 1168.14    | 1.73E-08      |
| <i>RELN</i>    | 625.99  | 317.37  | 15.14    | 41.36       | 20.97      | 8.57E-08      |
| <i>PQLC2L</i>  | 474.41  | 45.57   | 20.39    | 23.26       | 2.23       | 8.76E-08      |
| <i>KCNIP1</i>  | 12854.6 | 2628.46 | 27.67    | 464.65      | 95.01      | 1.07E-07      |
| <i>ANTXR1</i>  | 21469.4 | 11746.6 | 48.84    | 439.59      | 240.52     | 2.72E-07      |
| <i>APOL2</i>   | 3848.29 | 3304.00 | 41764    | −10.85      | −12.64     | 4.91E-07      |
| <i>DKK3</i>    | 3956.48 | 5914.33 | 143.01   | 27.67       | 41.36      | 8.11E-07      |
| <i>EVI2A</i>   | 156.50  | 1052.79 | 17.75    | 8.82        | 59.30      | 9.72E-07      |
| <i>DSC2</i>    | 501.46  | 380.04  | 26.91    | 18.64       | 14.12      | 1.05E-06      |
| <i>PRODH</i>   | 42.52   | 41.36   | 286.03   | −6.73       | −6.92      | 1.20E-06      |
| <i>COL12A1</i> | 1595.73 | 205.07  | 32.90    | 48.50       | 6.23       | 1.20E-06      |
| <i>ENPP3</i>   | 67.65   | 64.00   | 670.92   | −9.92       | −10.48     | 1.43E-06      |
| <i>BORCS</i>   | 22.63   | 45.25   | 304.44   | −13.45      | −6.73      | 1.59E-06      |
| <i>SEMA5A</i>  | 149522  | 81245.4 | 2628.4   | 56.89       | 30.91      | 1.71E-06      |
| <i>DNAJC1</i>  | 5996.90 | 4389.98 | 64.89    | 92.41       | 67.65      | 2.04E-06      |
| <i>GNG4</i>    | 222.86  | 369.65  | 17.15    | 13.00       | 21.56      | 2.11E-06      |
| <i>CLMP</i>    | 592.22  | 1468.37 | 68.12    | 8.69        | 21.56      | 2.34E-06      |
| <i>HERC5</i>   | 290.02  | 296.11  | 17.88    | 16.22       | 16.56      | 2.57E-06      |
| <i>DMKN</i>    | 50.56   | 256.00  | 20.53    | 2.46        | 12.47      | 2.73E-06      |
| <i>CA12</i>    | 458.25  | 2179.83 | 69272    | −151.17     | −31.78     | 2.76E-06      |
| <i>SLC38A5</i> | 1924.14 | 26249.4 | 108.38   | 17.75       | 242.19     | 3.28E-06      |
| <i>AGA</i>     | 1360.57 | 1060.11 | 292.04   | 4.66        | 3.63       | 4.43E-06      |
| <i>PSG5</i>    | 102126  | 2256.70 | 48.84    | 2091.03     | 46.21      | 4.79E-06      |
| <i>CCDC80</i>  | 22226.6 | 27939.1 | 84.45    | 263.20      | 330.84     | 5.04E-06      |
| <i>SFTA1P</i>  | 448.82  | 131.60  | 36.50    | 12.30       | 3.61       | 5.33E-06      |
| <i>SERPIN2</i> | 1807.78 | 7281.40 | 430.54   | 4.20        | 16.91      | 5.54E-06      |
| <i>CHRD1</i>   | 14066.7 | 65083.3 | 209.38   | 67.18       | 310.83     | 6.70E-06      |
| <i>COL6A3</i>  | 7590.61 | 38165.9 | 64.45    | 117.78      | 592.22     | 7.17E-06      |
| <i>ST6GL1</i>  | 102.54  | 218.27  | 25.28    | 4.06        | 8.63       | 7.39E-06      |
| <i>VWDE</i>    | 533.74  | 512.00  | 30.27    | 17.63       | 16.91      | 8.87E-06      |
| <i>AAMTS5</i>  | 4299.64 | 2272.40 | 29.24    | 147.03      | 77.71      | 9.11E-06      |
| <i>RRAGD</i>   | 2896.31 | 1710.26 | 24.59    | 117.78      | 69.55      | 9.13E-06      |
| <i>HIF0</i>    | 280.14  | 110.66  | 40.79    | 6.87        | 2.71       | 9.44E-06      |
| <i>NOG</i>     | 238.86  | 151.17  | 21.56    | 11.08       | 7.01       | 9.46E-06      |
| <i>ALPK3</i>   | 15.45   | 16.45   | 51.27    | −3.32       | −3.12      | 9.51E-06      |
| <i>MYLK</i>    | 4482.23 | 2702.35 | 317.37   | 14.12       | 8.51       | 9.53E-06      |
| <i>KLF8</i>    | 109.90  | 42.22   | 11.31    | 9.71        | 3.73       | 1.06E-05      |
| <i>AS3MT</i>   | 20.82   | 35.75   | 315.17   | −15.14      | −8.82      | 1.11E-05      |
| <i>BARX2</i>   | 11.79   | 11.39   | 47.18    | −4.00       | −4.14      | 1.18E-05      |
| <i>TSPAN2</i>  | 3169.41 | 744.43  | 116.16   | 27.28       | 6.41       | 1.21E-05      |
| <i>NPAS2</i>   | 333.14  | 501.46  | 74.03    | 4.50        | 6.77       | 1.22E-05      |
| <i>RNF150</i>  | 135.30  | 109.90  | 10.13    | 13.36       | 10.85      | 1.24E-05      |
| <i>HOXA13</i>  | 60.97   | 123.64  | 26.35    | 2.31        | 4.69       | 1.32E-05      |
| <i>CRYAB</i>   | 27939.1 | 1686.71 | 20.11    | 1389.16     | 83.87      | 1.39E-05      |
| <i>PDE1C</i>   | 81.01   | 235.57  | 32.45    | 2.50        | 7.26       | 1.50E-05      |
| <i>LINC003</i> | 39.12   | 27.10   | 292.04   | −7.46       | −10.78     | 1.51E-05      |
| <i>MOXD1</i>   | 8135.41 | 10226.3 | 568.10   | 14.32       | 18.00      | 1.54E-05      |
| <i>PTCH1</i>   | 407.31  | 153.28  | 64.89    | 6.28        | 2.36       | 1.67E-05      |
| <i>TNS3</i>    | 4737.79 | 6122.90 | 1136.2   | 4.17        | 5.39       | 2.06E-05      |
| <i>Clorf21</i> | 7332.05 | 5556.65 | 372.22   | 19.70       | 14.93      | 2.53E-05      |
| <i>SAA1</i>    | 1243.34 | 98.36   | 25.63    | 48.50       | 3.84       | 2.73E-05      |
| <i>DZIP1</i>   | 330.84  | 250.73  | 55.33    | 5.98        | 4.53       | 2.80E-05      |
| <i>PTHLH</i>   | 613.11  | 292.04  | 12503    | −20.39      | −42.81     | 2.85E-05      |
| <i>CDR1</i>    | 1734.13 | 1217.75 | 37.53    | 46.21       | 32.45      | 2.86E-05      |
| <i>SIX1</i>    | 230.72  | 207.94  | 27.10    | 8.51        | 7.67       | 3.05E-05      |
| <i>ECHDC2</i>  | 955.43  | 1105.13 | 3565.7   | −3.73       | −3.23      | 3.74E-05      |
| <i>ITGB3</i>   | 130.69  | 158.68  | 24.25    | 5.39        | 6.54       | 3.90E-05      |
| <i>AJAP1</i>   | 374.81  | 112.21  | 35.75    | 10.48       | 3.14       | 4.05E-05      |
| <i>PLPP3</i>   | 100.43  | 367.09  | 15.14    | 6.63        | 24.25      | 4.15E-05      |
| <i>SLC16A4</i> | 58.49   | 76.64   | 2048.0   | −35.02      | −26.72     | 4.61E-05      |
| <i>TRAM2</i>   | 15393.1 | 10960.3 | 744.43   | 20.68       | 14.72      | 5.11E-05      |
| <i>PPIC</i>    | 9741.98 | 5442.30 | 1722.1   | 5.66        | 3.16       | 5.14E-05      |
| <i>PTPN20</i>  | 18.64   | 14.62   | 101.83   | −5.46       | −6.96      | 5.34E-05      |
| <i>PRSS12</i>  | 184.82  | 58.49   | 23.92    | 7.73        | 2.45       | 5.35E-05      |

|                |          |          |         |        |        |          |
|----------------|----------|----------|---------|--------|--------|----------|
| <i>PMP22</i>   | 7281.40  | 19349.3  | 749.61  | 9.71   | 25.81  | 5.56E-05 |
| <i>SORT1</i>   | 3902.01  | 1552.09  | 62.68   | 62.25  | 24.76  | 5.76E-05 |
| <i>TRIM22</i>  | 82.14    | 53.45    | 661.68  | −8.06  | −12.38 | 5.79E-05 |
| <i>COL6A1</i>  | 240.52   | 670.92   | 49.18   | 4.89   | 13.64  | 5.92E-05 |
| <i>BASP1</i>   | 4608.24  | 5712.87  | 243.88  | 18.90  | 23.43  | 6.45E-05 |
| <i>SHISA9</i>  | 304.44   | 229.13   | 56.89   | 5.35   | 4.03   | 6.61E-05 |
| <i>PTGFR</i>   | 401.71   | 588.13   | 21.26   | 18.90  | 27.67  | 6.79E-05 |
| <i>ST3GAL6</i> | 87.43    | 93.70    | 32.67   | 2.68   | 2.87   | 6.92E-05 |
| <i>ACSM3</i>   | 191.34   | 604.67   | 12854.  | −67.18 | −21.26 | 7.07E-05 |
| <i>CUX1</i>    | 9216.48  | 12330.98 | 81810.5 | −8.88  | −6.63  | 7.35E-05 |
| <i>DLG5</i>    | 68.59    | 50.21    | 176.07  | −2.57  | −3.51  | 7.67E-05 |
| <i>ADAMTS3</i> | 125.37   | 200.85   | 31.12   | 4.03   | 6.45   | 7.82E-05 |
| <i>AFAP1L1</i> | 45.89    | 30.48    | 11.31   | 4.06   | 2.69   | 7.84E-05 |
| <i>PID1</i>    | 37.53    | 34.30    | 10.48   | 3.58   | 3.27   | 7.92E-05 |
| <i>RPS6KA2</i> | 393.44   | 203.66   | 56.10   | 7.01   | 3.63   | 7.99E-05 |
| <i>DHCR7</i>   | 5404.70  | 3541.14  | 91.14   | 59.30  | 38.85  | 8.12E-05 |
| <i>BET1</i>    | 1884.54  | 4640.29  | 9475.59 | −5.03  | −2.04  | 8.38E-05 |
| <i>PVRL1</i>   | 138.14   | 73.52    | 10.27   | 13.45  | 7.16   | 8.42E-05 |
| <i>KCNIP3</i>  | 467.88   | 132.51   | 18.90   | 24.76  | 7.01   | 9.16E-05 |
| <i>PIK3IP1</i> | 81.01    | 65.34    | 21.11   | 3.84   | 3.10   | 9.22E-05 |
| <i>NID2</i>    | 1379.57  | 8364.13  | 73.01   | 18.90  | 114.56 | 9.45E-05 |
| <i>SEMA6A</i>  | 630.35   | 786.88   | 35857.8 | −56.89 | −45.57 | 0.0001   |
| <i>PCSK5</i>   | 56.10    | 125.37   | 1067.48 | −19.03 | −8.51  | 0.0001   |
| <i>KMO</i>     | 133.44   | 207.94   | 1408.55 | −10.56 | −6.77  | 0.0001   |
| <i>PHKA2</i>   | 29.24    | 31.78    | 290.02  | −9.92  | −9.13  | 0.0001   |
| <i>ANXA4</i>   | 47314.67 | 30786.28 | 447026  | −9.45  | −14.52 | 0.0001   |
| <i>RPRD1B</i>  | 401.71   | 501.46   | 1509.65 | −3.76  | −3.01  | 0.0001   |
| <i>UFSP2</i>   | 362.04   | 286.03   | 86.22   | 4.20   | 3.32   | 0.0001   |
| <i>C1QTNF1</i> | 221.32   | 171.25   | 49.52   | 4.47   | 3.46   | 0.0001   |
| <i>PANK3</i>   | 1992.00  | 1200.98  | 347.29  | 5.74   | 3.46   | 0.0001   |
| <i>PSG2</i>    | 230.72   | 77.71    | 33.82   | 6.82   | 2.30   | 0.0001   |
| <i>DPYSL2</i>  | 388.02   | 477.71   | 50.91   | 7.62   | 9.38   | 0.0001   |
| <i>HIF1A</i>   | 365623.6 | 577715   | 27939.1 | 13.09  | 20.68  | 0.0001   |
| <i>ZNF318</i>  | 6427.31  | 2005.85  | 357.05  | 18.00  | 5.62   | 0.0001   |

**Table S5.** List of top 100 differentially expressed genes between A498 parental (P) and resistant clones c1 and c2. Arranged according to FDR *F-value*.

| Gene            | Clone#1   | Clone#2  | Parental | c1/P (Fold) | c2/P(Fold) | <i>p</i> -val         |
|-----------------|-----------|----------|----------|-------------|------------|-----------------------|
| <i>FN1</i>      | 18.51     | 19.70    | 661.68   | −35.73      | −33.42     | $3.76 \times 10^{-5}$ |
| <i>RHOB</i>     | 10513.82  | 14766.09 | 657.11   | 16.02       | 22.45      | 0.0004                |
| <i>FAR2</i>     | 1226.22   | 68.59    | 190.02   | 6.47        | −2.77      | 0.002                 |
| <i>TINAGL1</i>  | 670.92    | 42.81    | 18.51    | 36.39       | 2.32       | 0.002                 |
| <i>HEXA</i>     | 12416.75  | 9475.59  | 143.01   | 86.76       | 66.46      | 0.002                 |
| <i>SULT1A4</i>  | 724.08    | 433.53   | 2817.11  | −3.89       | −6.51      | 0.0022                |
| <i>CIS</i>      | 533.74    | 4513.40  | 20171.07 | −37.8       | −4.47      | 0.0057                |
| <i>SEC14L2</i>  | 159.79    | 200.85   | 962.07   | −6.03       | −4.81      | 0.0057                |
| <i>BST2</i>     | 306.55    | 240.52   | 47.50    | 6.46        | 5.07       | 0.0057                |
| <i>GLRXP</i>    | 47.18     | 46.53    | 306.55   | −6.48       | −6.57      | 0.0059                |
| <i>ADGRG2</i>   | 113.77    | 3213.66  | 259.57   | −2.28       | 12.39      | 0.0059                |
| <i>CYR61</i>    | 25709.25  | 13216.02 | 1060.11  | 24.22       | 12.5       | 0.0059                |
| <i>DNAJC15</i>  | 17.15     | 17.39    | 114.56   | −6.67       | −6.6       | 0.0078                |
| <i>ANPEP</i>    | 4770.75   | 401.71   | 24491.61 | −5.15       | −61.07     | 0.0083                |
| <i>DMKN</i>     | 1097.50   | 781.44   | 75.58    | 14.51       | 10.39      | 0.0083                |
| <i>UBE2L6</i>   | 7643.41   | 3666.02  | 955.43   | 8           | 3.84       | 0.0094                |
| <i>DOK4</i>     | 526.39    | 401.71   | 2256.70  | −4.3        | −5.65      | 0.0109                |
| <i>TNSI</i>     | 28.25     | 21.71    | 233.94   | −8.29       | −10.74     | 0.011                 |
| <i>FAM111A</i>  | 1458.23   | 4153.18  | 151.17   | 9.64        | 27.39      | 0.011                 |
| <i>MRPS35</i>   | 7383.04   | 1144.10  | 2628.46  | 2.81        | −2.29      | 0.0111                |
| <i>MAL2</i>     | 23331.64  | 17928.91 | 1243.34  | 18.7        | 14.37      | 0.0123                |
| <i>plylo</i>    | 24.42     | 30.70    | 199.47   | −8.21       | −6.52      | 0.0164                |
| <i>PRKAR2A</i>  | 16.91     | 22.32    | 88.03    | −5.2        | −3.96      | 0.0164                |
| <i>NPC2</i>     | 21027.65  | 23331.64 | 4482.23  | 4.68        | 5.2        | 0.0164                |
| <i>ITGB3</i>    | 7750.10   | 744.43   | 1734.13  | 4.47        | −2.34      | 0.0167                |
| <i>N4BP1</i>    | 955.43    | 831.75   | 2817.11  | −2.96       | −3.4       | 0.0168                |
| <i>TMEM139</i>  | 1251.98   | 1746.20  | 149.09   | 8.42        | 11.74      | 0.0168                |
| <i>USH1C</i>    | 38.59     | 72.00    | 484.38   | −12.48      | −6.72      | 0.0171                |
| <i>NAMPT</i>    | 744.43    | 1370.04  | 5955.47  | −8.05       | −4.35      | 0.0171                |
| <i>PRKD3</i>    | 80.45     | 17.63    | 280.14   | −3.48       | −15.94     | 0.0171                |
| <i>FCHSD2</i>   | 3061.45   | 4067.71  | 448.82   | 6.82        | 9.1        | 0.0174                |
| <i>LINC0067</i> | 85.04     | 588.13   | 1951.00  | −22.96      | −3.34      | 0.0191                |
| <i>NEDD4L</i>   | 2936.74   | 1499.22  | 481.04   | 6.14        | 3.12       | 0.0191                |
| <i>ST3GAL6</i>  | 94.35     | 83.87    | 754.83   | −8.02       | −9.01      | 0.0196                |
| <i>ARHGAP1</i>  | 2005.85   | 6122.90  | 13873.08 | −6.92       | −2.26      | 0.0196                |
| <i>MIR3654</i>  | 198668.00 | 177812.4 | 55108.99 | 3.61        | 3.24       | 0.0196                |
| <i>SNAPC1</i>   | 24154.43  | 5007.93  | 1698.45  | 14.22       | 2.95       | 0.0196                |
| <i>TTC9C</i>    | 685.02    | 504.95   | 146.02   | 4.7         | 3.47       | 0.0222                |
| <i>SLC35F2</i>  | 1448.15   | 354.59   | 159.79   | 9.03        | 2.21       | 0.0223                |
| <i>SERINC5</i>  | 310.83    | 541.19   | 2076.59  | −6.69       | −3.83      | 0.0225                |
| <i>ETFB</i>     | 2876.30   | 2019.80  | 9741.98  | −3.39       | −4.83      | 0.0225                |
| <i>ANKRD13</i>  | 1097.50   | 2105.58  | 501.46   | 2.19        | 4.19       | 0.0225                |
| <i>PPFIBP1</i>  | 13493.72  | 734.19   | 2759.13  | 4.89        | −3.77      | 0.0225                |
| <i>GLRX</i>     | 1234.75   | 2683.69  | 29532.18 | −23.91      | −10.95     | 0.0232                |
| <i>NOB1</i>     | 3743.05   | 3326.99  | 13307.94 | −3.55       | −3.98      | 0.0239                |
| <i>WDR59</i>    | 729.11    | 116.16   | 278.20   | 2.62        | −2.39      | 0.0239                |
| <i>STX3</i>     | 3929.15   | 4737.79  | 471.14   | 8.35        | 10.06      | 0.0239                |
| <i>SCIN</i>     | 512.00    | 11190.60 | 52.35    | 9.81        | 213.89     | 0.0239                |
| <i>SLFN13</i>   | 401.71    | 308.69   | 32.00    | 12.55       | 9.66       | 0.0239                |
| <i>VPS26B</i>   | 6208.38   | 2683.69  | 1332.57  | 4.68        | 2.01       | 0.0247                |
| <i>PCED1B</i>   | 86.22     | 218.27   | 749.61   | −8.71       | −3.42      | 0.0262                |
| <i>NUAK2</i>    | 6888.62   | 3125.78  | 263.20   | 26.07       | 11.88      | 0.0262                |
| <i>ACKR3</i>    | 317.37    | 3420.52  | 21769.19 | −68.22      | −6.35      | 0.0285                |
| <i>FGFR2</i>    | 634.73    | 1686.71  | 72.00    | 8.79        | 23.46      | 0.0299                |
| <i>NAMPTP3</i>  | 2005.85   | 6888.62  | 23331.64 | −11.63      | −3.37      | 0.0301                |
| <i>MAN1A1</i>   | 182.28    | 171.25   | 885.29   | −4.85       | −5.17      | 0.0301                |
| <i>WASF3</i>    | 222.86    | 168.90   | 33.13    | 6.74        | 5.1        | 0.0301                |
| <i>EPB41L2</i>  | 11268.44  | 14664.09 | 1458.23  | 7.75        | 10.06      | 0.0301                |
| <i>DCLK1</i>    | 265.03    | 136.24   | 24.08    | 11          | 5.65       | 0.0301                |
| <i>CNOT1</i>    | 2574.36   | 2957.17  | 10884.59 | −4.24       | −3.68      | 0.0323                |
| <i>KAZN</i>     | 130.69    | 65.80    | 20.39    | 6.38        | 3.23       | 0.0323                |
| <i>TPK1</i>     | 8079.22   | 26068.14 | 1060.11  | 7.62        | 24.73      | 0.0338                |
| <i>RP11–24</i>  | 3169.41   | 380.04   | 1176.27  | 2.69        | −3.09      | 0.0365                |
| <i>AKR1E2</i>   | 82.14     | 8.82     | 30.06    | 2.72        | −3.41      | 0.0372                |
| <i>RHOD</i>     | 1296.13   | 1176.27  | 240.52   | 5.37        | 4.86       | 0.0387                |

|                  |           |          |          |        |        |        |
|------------------|-----------|----------|----------|--------|--------|--------|
| <i>ZBTB40</i>    | 243.88    | 160.90   | 68.59    | 3.55   | 2.34   | 0.039  |
| <i>CDK10</i>     | 166.57    | 163.14   | 625.99   | −3.76  | −3.83  | 0.0407 |
| <i>ARL4C</i>     | 3902.01   | 1160.07  | 11585.24 | −2.97  | −9.99  | 0.041  |
| <i>NRP1</i>      | 2005.85   | 749.61   | 6208.38  | −3.09  | −8.32  | 0.0434 |
| <i>TNFAIP6</i>   | 73.52     | 215.27   | 1951.00  | −26.55 | −9.04  | 0.0443 |
| <i>KYNU</i>      | 128.89    | 333.14   | 1584.71  | −12.36 | −4.76  | 0.0444 |
| <i>CLMP</i>      | 1530.73   | 274.37   | 6984.79  | −4.56  | −25.41 | 0.0467 |
| <i>ANKRD44</i>   | 37.01     | 45.89    | 218.27   | −5.92  | −4.78  | 0.0477 |
| <i>FADS2</i>     | 998913.34 | 985161.0 | 279018.2 | 3.59   | 3.53   | 0.0477 |
| <i>NAE1</i>      | 922.88    | 648.07   | 2610.30  | −2.83  | −4.04  | 0.0483 |
| <i>EEF1A2</i>    | 1820.35   | 3258.52  | 826.00   | 2.2    | 3.94   | 0.0483 |
| <i>SC5D</i>      | 11268.44  | 3326.99  | 198.09   | 57.19  | 16.83  | 0.0483 |
| <i>KCNIP1</i>    | 8659.09   | 652.58   | 91.14    | 94.62  | 7.13   | 0.0483 |
| <i>CALML4</i>    | 165.42    | 261.38   | 1112.82  | −6.74  | −4.28  | 0.0502 |
| <i>SLC22A18S</i> | 263.20    | 572.05   | 1770.57  | −6.7   | −3.09  | 0.0544 |
| <i>STS</i>       | 42.81     | 89.26    | 18.25    | 2.35   | 4.87   | 0.0544 |
| <i>HNRNPUL</i>   | 1795.29   | 2385.37  | 634.73   | 2.84   | 3.77   | 0.0555 |
| <i>CSRP1</i>     | 831.75    | 328.56   | 97.01    | 8.58   | 3.38   | 0.0555 |
| <i>CLU3</i>      | 568.10    | 390.72   | 2385.37  | −4.2   | −6.1   | 0.0565 |
| <i>CLSTN1</i>    | 1398.83   | 1871.53  | 410.15   | 3.41   | 4.59   | 0.0565 |
| <i>CHKA</i>      | 1314.23   | 1009.90  | 128.00   | 10.2   | 7.85   | 0.0565 |
| <i>EZR</i>       | 87076.75  | 106463   | 15716.5  | 5.58   | 6.82   | 0.058  |
| <i>RSPRY1</i>    | 1418.35   | 1168.14  | 7858.29  | −5.53  | −6.68  | 0.0585 |
| <i>IL6</i>       | 13969.57  | 744.43   | 198.09   | 70.63  | 3.76   | 0.0586 |
| <i>NQO1</i>      | 197295.70 | 256749.1 | 746612.4 | −3.78  | −2.9   | 0.0602 |
| <i>SLX1</i>      | 369.65    | 233.94   | 1097.50  | −2.97  | −4.69  | 0.0602 |
| <i>TMSB4X</i>    | 40622.74  | 28924.41 | 5792.62  | 7.01   | 4.98   | 0.0602 |
| <i>PTGIS</i>     | 65.80     | 580.04   | 252.48   | −3.84  | 2.3    | 0.0606 |
| <i>RTN3</i>      | 32316.87  | 56658.31 | 10660.59 | 3.03   | 5.29   | 0.061  |
| <i>CORO1B</i>    | 526.39    | 685.02   | 222.86   | 2.36   | 3.08   | 0.0636 |
| <i>BAD</i>       | 213.78    | 407.31   | 105.42   | 2.03   | 3.88   | 0.0643 |
| <i>MYO1D</i>     | 8964.45   | 6746.86  | 552.56   | 16.22  | 12.22  | 0.0653 |
| <i>STARD10</i>   | 776.05    | 781.44   | 215.27   | 3.6    | 3.63   | 0.0654 |
| <i>HEBP1</i>     | 1675.06   | 2134.97  | 8364.13  | −5     | −3.93  | 0.0674 |
| <i>TRMT112</i>   | 14462.21  | 16270.83 | 3258.52  | 4.44   | 5      | 0.0674 |

**Table S6.** List of top 100 differentially expressed genes between Caki-1 parental (P) and resistant clones c1 and c2. Arranged according to FDR *F-value*.

| Gene     | Clone#1  | Clone#2 | Parental | c1/P (Fold) | c2/P(Fold) | p-val                 |
|----------|----------|---------|----------|-------------|------------|-----------------------|
| CA2      | 25.28    | 28.05   | 4240.45  | −168.05     | −151.18    | $2.44 \times 10^{-7}$ |
| FGB      | 8.22     | 12.21   | 8719.32  | 1063.42     | −713.71    | $2.52 \times 10^{-6}$ |
| PFKFB3   | 265.03   | 53.82   | 3169.41  | −11.93      | −58.82     | $4.02 \times 10^{-6}$ |
| TRHDE    | 25.81    | 8.57    | 278.20   | −10.77      | −32.5      | $4.26 \times 10^{-6}$ |
| COLEC10  | 1002.93  | 18053   | 116502   | −115.68     | −6.46      | $1.07 \times 10^{-5}$ |
| NR5A2    | 15.67    | 25.81   | 333.14   | −21.22      | −12.92     | $1.70 \times 10^{-5}$ |
| AOAH     | 17.03    | 20.53   | 471.14   | −27.68      | −22.99     | $4.40 \times 10^{-5}$ |
| SLC1A1   | 218.27   | 73.52   | 2120.22  | −9.71       | −28.94     | $4.40 \times 10^{-5}$ |
| SLC34A2  | 16.45    | 13.09   | 2164.77  | −131.7      | −164.79    | $4.40 \times 10^{-5}$ |
| ZPLD1    | 62.25    | 30.48   | 12077.2  | −194.15     | −394.76    | $5.71 \times 10^{-5}$ |
| GDA      | 26.17    | 16.56   | 484.38   | −18.57      | −29.4      | $6.26 \times 10^{-5}$ |
| DCDC2    | 146.02   | 162.02  | 3420.52  | −23.5       | −21.1      | $6.46 \times 10^{-5}$ |
| ACSM3    | 41.07    | 45.25   | 333.14   | −8.09       | −7.34      | $9.92 \times 10^{-5}$ |
| HAVCR1P1 | 643.59   | 294.07  | 10884.5  | −16.97      | −37.03     | 0.0001                |
| ADD3     | 194.01   | 198.09  | 2194.99  | −11.35      | −11.11     | 0.0001                |
| CD24P4   | 3717.20  | 1710.2  | 34397.2  | −9.23       | −20.07     | 0.0001                |
| HSPA12A  | 29.24    | 51.63   | 200.85   | −6.85       | −3.87      | 0.0001                |
| ADAMTS9  | 16.91    | 20.97   | 362.04   | −21.51      | −17.25     | 0.0001                |
| IDH2     | 1428.22  | 458.25  | 6562.36  | −4.6        | −14.28     | 0.0001                |
| ARRDC4   | 442.64   | 192.67  | 19.43    | 22.92       | 9.96       | 0.0002                |
| HNF1B    | 675.59   | 430.54  | 11113.30 | −16.39      | −25.86     | 0.0002                |
| KCNJ16   | 67.18    | 41.64   | 8248.98  | −122.59     | −198.35    | 0.0002                |
| SULF2    | 1184.45  | 40.79   | 184.82   | 6.41        | −4.53      | 0.0002                |
| LAMA3    | 709.18   | 765.36  | 29328.18 | −41.23      | −38.33     | 0.0002                |
| GUCY1B3  | 148.06   | 26.72   | 2005.85  | −13.52      | −74.79     | 0.0003                |
| FHL1     | 38431.46 | 164.28  | 436.55   | 87.93       | −2.66      | 0.0003                |
| TM4SF18  | 34.06    | 26.54   | 451.94   | −13.3       | −17.14     | 0.0003                |
| MLK4     | 48.17    | 119.43  | 1618.00  | −33.45      | −13.47     | 0.0003                |
| EPCAM    | 17.63    | 28.25   | 873.10   | −49.23      | −30.74     | 0.0003                |
| LRRN1    | 56658.31 | 401.71  | 69.07    | 820.71      | 5.8        | 0.0003                |
| SYT14    | 657.11   | 1478.8  | 75.06    | 8.71        | 19.61      | 0.0004                |
| HAVCR1   | 28526    | 23170   | 762300   | −26.81      | −33.06     | 0.0004                |
| HBEGF    | 3666.    | 424.61  | 1234.75  | 2.97        | −2.91      | 0.0004                |
| SLC4A4   | 39.12    | 30.91   | 568.10   | −14.49      | −18.36     | 0.0004                |
| AGT      | 85.63    | 15.78   | 427.57   | −4.98       | −27.07     | 0.0004                |
| LAMP3    | 1217.7   | 7538.8  | 221.32   | 5.5         | 34.13      | 0.0004                |
| ARHGAP29 | 3640.7   | 6746.8  | 32995.9  | −9.05       | −4.9       | 0.0005                |
| ERICH2   | 372.22   | 1675    | 131.60   | 2.82        | 12.71      | 0.0005                |
| SPP1     | 11036    | 15286   | 386470.  | −35.17      | −25.33     | 0.0005                |
| PDE1A    | 367.09   | 32.45   | 170.07   | 2.15        | −5.25      | 0.0005                |
| GUCY1A3  | 11.31    | 12.91   | 230.72   | −20.41      | −17.97     | 0.0005                |
| CXXC5    | 315.17   | 159.79  | 1418.35  | −4.48       | −8.85      | 0.0006                |
| CIQTNF1  | 352.14   | 280.14  | 50.56    | 6.95        | 5.54       | 0.0006                |
| GNMB     | 38967    | 9864    | 4153.18  | 9.4         | 23.86      | 0.0006                |
| EFHB     | 12.13    | 18.51   | 109.14   | −9.04       | −5.93      | 0.0006                |
| MACROD   | 35.51    | 24.93   | 170.07   | −4.8        | −6.81      | 0.0006                |
| ANKRD29  | 137.19   | 176.07  | 1398.83  | −10.2       | −7.98      | 0.0006                |
| OSTM1    | 25006    | 20738   | 4299.64  | 5.82        | 4.84       | 0.0006                |
| SC5D     | 25321    | 68794   | 1595.73  | 158.5       | 43.24      | 0.0006                |
| NOV      | 143.01   | 522.76  | 31.56    | 4.53        | 16.49      | 0.0006                |
| PDE4D    | 26.17    | 224.41  | 1097.50  | −42.13      | −4.9       | 0.0006                |
| KIF12    | 6.68     | 9.06    | 30.48    | −4.54       | −3.35      | 0.0007                |
| HGD      | 49.87    | 35.02   | 704.28   | −14.17      | −20.13     | 0.0007                |
| PAR6B    | 3040.30  | 4124.4  | 14766.0  | −4.88       | −3.59      | 0.0007                |
| RCAN1    | 8248.98  | 2998.5  | 491.14   | 16.84       | 6.12       | 0.0008                |
| MLLT3    | 349.71   | 982.29  | 8023.41  | −22.93      | −8.12      | 0.0008                |
| ADGRG1   | 23010.4  | 2916.4  | 82952.6  | −3.6        | −28.43     | 0.0008                |
| AMIGO2   | 47.84    | 56.10   | 564.18   | −11.83      | −10.04     | 0.0008                |
| PDE5A    | 2134.97  | 407.31  | 31.56    | 67.79       | 12.89      | 0.0008                |
| SCG5     | 560.28   | 23.10   | 122.79   | 4.58        | −5.31      | 0.0008                |
| UGT2B7   | 229.13   | 128.89  | 2179.83  | −9.49       | −16.9      | 0.0009                |
| MOCOS    | 96.34    | 2486.6  | 809.00   | −8.36       | 3.08       | 0.001                 |

|                 |         |        |         |         |        |        |
|-----------------|---------|--------|---------|---------|--------|--------|
| <i>CYTH3</i>    | 12245.8 | 8719.3 | 1226.22 | 10.02   | 7.13   | 0.001  |
| <i>CTPS1</i>    | 6517.03 | 23331  | 2320.15 | 2.81    | 10.03  | 0.001  |
| <i>CRABP1</i>   | 16.00   | 14.03  | 51.63   | −3.24   | −3.69  | 0.001  |
| <i>NUPRI</i>    | 87076.7 | 13569  | 26068.1 | 3.34    | 5.21   | 0.001  |
| <i>TBLIXR1</i>  | 382.68  | 442.64 | 4451.27 | −11.69  | −10.1  | 0.0011 |
| <i>FUOM</i>     | 99.73   | 51.27  | 342.51  | −3.44   | −6.68  | 0.0011 |
| <i>EIF3E</i>    | 41476.3 | 52498. | 200049  | −4.82   | −3.8   | 0.0011 |
| <i>TRPC6</i>    | 75.06   | 45.57  | 272.48  | −3.62   | −5.94  | 0.0011 |
| <i>ARMC9</i>    | 4608.24 | 3640.0 | 729.11  | 6.34    | 5      | 0.0011 |
| <i>HMG A2</i>   | 144.01  | 149.09 | 1045.52 | −7.23   | −6.99  | 0.0012 |
| <i>SLC17A1</i>  | 22.63   | 53.45  | 398.93  | −17.71  | −7.47  | 0.0012 |
| <i>SAMD5</i>    | 362.04  | 44.63  | 19.70   | 18.34   | 2.25   | 0.0012 |
| <i>OR51B5</i>   | 64.00   | 99.04  | 1341.84 | −21.04  | −13.56 | 0.0012 |
| <i>CD24</i>     | 100024  | 51063. | 565826. | −5.66   | −11.11 | 0.0013 |
| <i>ANXA13</i>   | 15.67   | 14.42  | 124.50  | −7.96   | −8.65  | 0.0013 |
| <i>MYO1E</i>    | 2610.30 | 445.72 | 5595.30 | −2.15   | −12.59 | 0.0013 |
| <i>GGT8P</i>    | 35.26   | 19.29  | 75.06   | −2.14   | −3.89  | 0.0013 |
| <i>A-AS1</i>    | 5480.15 | 20031  | 43538.3 | −7.93   | −2.17  | 0.0013 |
| <i>KAT6B</i>    | 955.43  | 1192.6 | 3590.58 | −3.77   | −3.02  | 0.0013 |
| <i>DSC3</i>     | 31.78   | 48.17  | 261.38  | −8.17   | −5.41  | 0.0013 |
| <i>MKRN9P</i>   | 95950.3 | 4608.2 | 28526.2 | 3.37    | −6.2   | 0.0013 |
| <i>TNIK</i>     | 43.11   | 58.49  | 3492.39 | −81.17  | −59.9  | 0.0013 |
| <i>CAMLG</i>    | 962.07  | 1562.8 | 3795.30 | −3.93   | −2.43  | 0.0014 |
| <i>PTPN13</i>   | 1192.69 | 1710.2 | 13493.7 | −11.35  | −7.93  | 0.0015 |
| <i>AK4</i>      | 116.97  | 119.43 | 897.64  | −7.65   | −7.5   | 0.0015 |
| <i>RPL12P12</i> | 4482.23 | 5148.7 | 18053.6 | −4.01   | −3.51  | 0.0015 |
| <i>ANXA4</i>    | 12854.6 | 12944. | 80684.2 | −6.26   | −6.24  | 0.0016 |
| <i>ARHGAP1</i>  | 2957.17 | 2936.7 | 12765.8 | −4.3    | −4.32  | 0.0016 |
| <i>VCAM1</i>    | 1144.10 | 63743  | 313911  | −273.14 | −4.89  | 0.0016 |
| <i>ANPEP</i>    | 154.34  | 24.93  | 1097.50 | −7.1    | −44.02 | 0.0016 |
| <i>PALLD</i>    | 4640.29 | 792.35 | 1595.73 | 2.91    | −2.02  | 0.0016 |
| <i>CFAP70</i>   | 128.89  | 121.94 | 25.63   | 5.06    | 4.76   | 0.0016 |
| <i>CCL28</i>    | 304.44  | 66.72  | 24.25   | 12.53   | 2.75   | 0.0016 |
| <i>LIMA1</i>    | 33456.5 | 45073. | 3875.05 | 8.65    | 11.58  | 0.0016 |
| <i>CECR2</i>    | 8.34    | 10.85  | 45.89   | −5.5    | −4.24  | 0.0016 |
| <i>DAB2</i>     | 2149.82 | 613.11 | 4389.98 | −2.04   | −7.18  | 0.0017 |
| <i>SCG5</i>     | 439.59  | 22.63  | 149.09  | 2.96    | −6.58  | 0.0017 |

**Table S7.** List of significantly enriched KEGG pathways for 786-O cell line.

| # Genes<br>(Genes in<br>Pathway) | Description                                       | Genes                                                               | p-value               |
|----------------------------------|---------------------------------------------------|---------------------------------------------------------------------|-----------------------|
| 10 (149)                         | MicroRNAs in cancer                               | <i>HOXD10 NOTCH2 MMP16 ITGA5 PTGS2 PTEN RECK FSCN1 CDKN1A ITGB3</i> | $4.09 \times 10^{-9}$ |
| 8 (195)                          | Proteoglycans in cancer                           | <i>MMP2 HOXD10 ITGA5 RAC1 MSN CDKN1A HIF1A ITGB3</i>                | $1.61 \times 10^{-5}$ |
| 10 (515)                         | Pathways in cancer                                | <i>MMP2 NOTCH2 LRP6 EPAS1 SP1 RAC1 PTGS2 PTEN CDKN1A HIF1A</i>      | $3.34 \times 10^{-4}$ |
| 8 (317)                          | Human papillomavirus infection                    | <i>TBPL1 NOTCH2 ITGA5 PTGS2 PTEN PRK CZ CDKN1A ITGB3</i>            | $5.52 \times 10^{-4}$ |
| 4 (63)                           | Mitophagy – animal                                | <i>SP1 BECN1 BNIP3L HIF1A</i>                                       | $4.90 \times 10^{-4}$ |
| 4 (68)                           | Renal cell carcinoma                              | <i>EPAS1 RAC1 CDKN1A HIF1A</i>                                      | $6.51 \times 10^{-3}$ |
| 5 (147)                          | Breast cancer                                     | <i>NOTCH2 LRP6 SP1 PTEN CDKN1A</i>                                  | $9.33 \times 10^{-3}$ |
| 4 (98)                           | Choline metabolism in cancer                      | <i>SP1 WASF3 RAC1 HIF1A</i>                                         | $2.50 \times 10^{-3}$ |
| 5 (183)                          | Kaposi's sarcoma-associated herpesvirus infection | <i>RAC1 BECN1 PTGS2 CDKN1A HIF1A</i>                                | $2.50 \times 10^{-3}$ |
| 4 (95)                           | Endocrine resistance                              | <i>MMP2 NOTCH2 SP1 CDKN1A</i>                                       | $2.20 \times 10^{-3}$ |
| 6 (348)                          | PI3K–Akt signaling pathway                        | <i>ITGA5 RAC1 PTEN CDKN1A BDNF ITGB3</i>                            | $6.70 \times 10^{-3}$ |
| 4 (133)                          | Fluid shear stress and atherosclerosis            | <i>MMP2 RAC1 PRKCZ ITGB3</i>                                        | $7.70 \times 10^{-3}$ |



**Table S8.** List of significantly enriched KEGG pathways for A498 cell line.

| # Genes (Genes in Pathway) | Description                | Genes      | p-value               |
|----------------------------|----------------------------|------------|-----------------------|
| 2 (87)                     | Gap junction               | EGFR ITPR1 | $3.00 \times 10^{-3}$ |
| 2 (88)                     | GnRH signaling pathway     | EGFR ITPR1 | $3.10 \times 10^{-3}$ |
| 2 (133)                    | Estrogen signaling pathway | EGFR ITPR1 | $7.00 \times 10^{-3}$ |
| 2 (133)                    | Apelin signaling pathway   | ITPR1 CTGF | $7.00 \times 10^{-3}$ |
| 2 (149)                    | Proteoglycans in cancer    | EGFR ITPR1 | $8.70 \times 10^{-3}$ |
| 2 (153)                    | PI3K-Akt signaling pathway | EGFR ITPR1 | $9.20 \times 10^{-3}$ |

**Table S9.** List of significantly enriched KEGG pathways for Caki-1 cell line.

| # Genes (Genes in Pathway) | Description                            | Genes                       | p-value               |
|----------------------------|----------------------------------------|-----------------------------|-----------------------|
| 5 (133)                    | Fluid shear stress and atherosclerosis | KLF2 ITGAV ICAM1 CAV1 ITGB3 | $9.34 \times 10^{-6}$ |
| 4 (115)                    | Thyroid hormone signaling pathway      | CCND1 ITGAV SLC2A1 ITGB3    | $2.90 \times 10^{-5}$ |
| 3 (56)                     | Viral myocarditis                      | CCND1 ICAM1 CAV1            | $1.71 \times 10^{-3}$ |
| 4 (195)                    | Proteoglycans in cancer                | CCND1 ITGAV CAV1 ITGB3      | $2.22 \times 10^{-3}$ |
| 4 (197)                    | Focal adhesion                         | CCND1 ITGAV CAV1 ITGB3      | $2.31 \times 10^{-3}$ |
| 4 (317)                    | Human papillomavirus infection         | CCND1 IRF1 ITGAV ITGB3      | $1.40 \times 10^{-3}$ |
| 3 (133)                    | Apelin signaling pathway               | CCND1 KLF2 CTGF             | $2.10 \times 10^{-3}$ |
| 3 (149)                    | MicroRNAs in cancer                    | CCND1 DNMT3B ITGB3          | $2.90 \times 10^{-3}$ |
| 3 (152)                    | Hippo signaling pathway                | CCND1 CTGF BMP2             | $3.00 \times 10^{-3}$ |
| 4 (515)                    | Pathways in cancer                     | CCND1 ITGAV BMP2 SLC2A1     | $8.80 \times 10^{-3}$ |

**Table S10.** List of primary and secondary antibodies used in the Western Blots. All antibodies were diluted in 5% non-fat dry milk in TBS-T.

| Anti-             | Cat. No. | Dilution | Manufacturer                 |
|-------------------|----------|----------|------------------------------|
| HIF-1 $\alpha$    | 610958   | 1:250    | BD Transduction Laboratories |
| HIF-2 $\alpha$    | sc-46691 | 1:500    | Santa Cruz                   |
| PD-L1             | #13684   | 1:500    | Cell Signaling Technologies  |
| Cyclin D1         | ab16663  | 1:500    | Abcam                        |
| $\beta$ -actin    | A5441    | 1:5000   | Sigma                        |
| $\alpha$ -tubulin | ab52866  | 1:1000   | Abcam                        |
| Mouse, IgG-HRP    | sc-2005  | 1:2000   | Santa Cruz                   |
| Rabbit, IgG-HRP   | sc-2357  | 1:2000   | Santa Cruz                   |
